# Supplementary material for: Genome-wide CRISPR/Cas9 screening in human iPS derived cardiomyocytes uncovers novel mediators of doxorubicin cardiotoxicity
Source: Sci Rep. 2021 Jul 6;11:13866. doi: 10.1038/s41598-021-92988-1 (PMC8260754; doi:10.1038/s41598-021-92988-1)
Supplement: Supplementary file 2 — Supplementary Information 2. [file 41598_2021_92988_MOESM2_ESM.xlsx]

## Sheet: Sheet1
GeneName	Number sgRNA in Control Cardiomyocytes	sgRNA ranks	p.value	log2 Fold Change Doxorubicin/Control Cardiomyocytes
EDC4	2	1076, 48	0.001275	3.93
GALNT18	2	590, 217	0.000162	3.84
C1QTNF2	2	707, 164	0.000332	3.84
EIF1AD	2	1297, 393	0.00212	3.49
PALMD	2	2884, 116	0.01401	3.43
XRN2	2	736, 1267	0.001978	3.34
TMEM189	2	444, 1899	0.005537	3.34
MANEAL	2	1872, 494	0.00534	3.32
C11orf49	2	1458, 952	0.002871	3.23
ARL6IP4	2	1068, 1325	0.002235	3.22
GUCY2C	2	762, 1797	0.004867	3.22
GLIPR1L2	2	4427, 159	0.0337	3.17
F10	2	532, 2644	0.01168	3.16
MRS2	2	666, 2427	0.009701	3.14
NAGS	2	6451, 60	0.05834	3.1
MYC	2	1560, 1414	0.003421	3.08
SLCO1A2	2	514, 3170	0.01716	3.08
TFPT	2	872, 2508	0.0104	3.05
MATR3	2	474, 3708	0.0237	3.03
ENTHD2	2	1513, 1779	0.004763	3.01
CAB39L	2	4226, 486	0.03081	2.96
ELFN2	2	157, 6182	0.06324	2.96
EXOSC10	2	3181, 940	0.01725	2.93
KDM3B	2	5392, 310	0.04912	2.91
C11orf57	2	1157, 2940	0.01459	2.9
KIAA1033	2	737, 3835	0.02537	2.9
CYP3A7	2	601, 4295	0.03182	2.9
C5orf51	2	1524, 2411	0.009541	2.89
MMP24	2	5761, 313	0.05554	2.87
HMHB1	2	5981, 317	0.05955	2.84
GPC2	2	284, 6176	0.06312	2.84
RRAS	2	1137, 3382	0.01964	2.83
BUD13	2	1434, 2993	0.01515	2.82
ZNHIT3	2	1080, 3752	0.02425	2.8
PRRG3	2	2678, 1835	0.012	2.79
GGT6	3	8250, 19, 4024	0.04464	2.79
UMPS	2	397, 5987	0.05966	2.79
FUNDC2	2	4401, 898	0.03337	2.78
SLCO1B3	3	2268, 2270, 2362	0.001289	2.76
GLRX3	3	2631, 887, 4136	0.008751	2.76
POU6F1	2	11082, 29	0.01612	2.76
TEX36	3	6254, 1203, 961	0.02844	2.76
PLEKHO1	2	1451, 3493	0.02095	2.74
TGFA	3	4400, 1133, 2349	0.01057	2.72
DUSP15	3	7109, 3434, 153	0.03995	2.71
COX5B	2	1824, 3325	0.0189	2.69
IFT81	2	4105, 1318	0.02905	2.69
GABARAPL1	2	163, 8810	0.05486	2.69
ZNF474	2	1150, 4538	0.03536	2.68
MSANTD4	2	2025, 3246	0.018	2.66
DGCR8	2	1664, 3766	0.02443	2.66
OSBPL9	3	2517, 7566, 373	0.04691	2.66
MPDU1	2	900, 5305	0.0476	2.66
KCNJ14	2	1359, 4604	0.03637	2.62
INF2	2	2663, 2857	0.01372	2.61
TSSC1	3	311, 1331, 11630	0.01102	2.6
ANKRD20A4	2	8346, 320	0.08268	2.6
STT3A	4	6641, 646, 3669, 2121	0.01546	2.59
GRAMD4	3	270, 5914, 4983	0.02446	2.59
GTDC1	2	2776, 2926	0.01443	2.58
CORO1B	3	3277, 2149, 3293	0.004237	2.57
FOXH1	2	6478, 770	0.06878	2.57
CCDC61	2	13394, 44	0.01052	2.54
ING1	2	5258, 1355	0.04683	2.54
TMTC3	2	9598, 242	0.05658	2.54
IFNW1	2	6968, 708	0.07839	2.54
SLC25A6	2	134, 11050	0.03109	2.53
GH2	2	1847, 4557	0.03564	2.52
KCNS1	2	1125, 6002	0.05992	2.52
CDKL3	2	5671, 1290	0.05395	2.51
PHLDA3	2	501, 8370	0.1023	2.5
TET3	2	8027, 600	0.1	2.49
STEAP4	2	2731, 3656	0.02304	2.48
POM121	2	3929, 2531	0.02663	2.48
POLQ	2	5357, 1555	0.04851	2.48
CPNE8	2	787, 7278	0.08465	2.48
DNAJC10	2	3142, 3209	0.01756	2.47
ARTN	2	182, 11145	0.03649	2.46
SPACA1	2	7715, 741	0.09352	2.46
GOLT1B	2	7896, 699	0.09731	2.46
CYBB	2	607, 8347	0.1068	2.46
CRYGB	3	70, 16862, 1605	0.004367	2.45
PHOSPHO2-KLHL23	2	349, 9936	0.06463	2.44
NUCB2	3	10363, 11770, 1	0.003804	2.43
SLC25A51	3	3761, 3930, 2515	0.007482	2.42
DGCR2	2	171, 11781	0.03105	2.42
CCDC85C	2	2313, 4696	0.03785	2.42
SLC48A1	2	1136, 6896	0.07691	2.42
TOMM40	2	3719, 3122	0.02383	2.41
TNNC2	2	2221, 4872	0.04055	2.41
SERPINB2	3	4243, 212, 10112	0.0606	2.41
BEST4	3	3078, 8940, 751	0.06873	2.4
PRAP1	2	982, 7478	0.08861	2.4
SHD	2	2417, 4749	0.03862	2.39
CMPK2	2	273, 11009	0.04613	2.39
ARHGAP32	2	2543, 4726	0.03829	2.38
SLC44A5	2	6342, 1523	0.06617	2.38
TRIM11	2	1097, 7327	0.08561	2.38
CDC14A	3	6015, 4676, 1101	0.02562	2.37
OR8G5	2	15695, 32	0.005277	2.36
ZNF559	3	6228, 2720, 2404	0.02811	2.36
ENPP3	2	4278, 3003	0.03158	2.36
HOXA10	2	2701, 4659	0.03726	2.36
OST4	2	6700, 1431	0.07305	2.36
TAGLN2	3	6650, 2047, 2909	0.03345	2.35
CABYR	2	5159, 2360	0.04522	2.35
BST2	3	6519, 3549, 1734	0.03171	2.34
PRKRA	2	1204, 7479	0.08863	2.34
BCR	2	8389, 933	0.1077	2.34
NAT1	3	2108, 714, 12399	0.02251	2.32
CCKAR	2	6920, 1509	0.07739	2.32
SEMA6A	2	8631, 925	0.113	2.32
PDE1B	3	4569, 6275, 1472	0.02866	2.3
COL19A1	4	1471, 8589, 2616, 4135	0.03657	2.3
COL4A2	3	2798, 13917, 291	0.0201	2.29
ATPAF2	2	2655, 5257	0.04682	2.29
HIRIP3	2	13404, 188	0.02358	2.27
RNF13	2	2696, 5368	0.04869	2.27
ZBTB22	2	2620, 5642	0.0534	2.26
ZBTB41	2	743, 10062	0.09947	2.25
CD163	3	2627, 12026, 912	0.03519	2.24
FKBP1A	2	7731, 1494	0.09386	2.24
CD164L2	2	803, 9970	0.1052	2.24
SERPINC1	2	4930, 3275	0.04147	2.23
TMEM205	2	7639, 1585	0.09195	2.23
CHTF8	2	1238, 8549	0.1112	2.23
SMPDL3B	3	20164, 558, 324	0.005744	2.22
OR52N4	2	323, 12760	0.03684	2.22
NLRP14	2	467, 11734	0.05541	2.22
SVIL	3	539, 8418, 6341	0.06122	2.22
VPS41	2	9077, 1121	0.1231	2.22
BCAN	3	1914, 14002, 897	0.01571	2.21
H1F0	2	241, 13551	0.02624	2.21
EPS8	2	3424, 4899	0.04096	2.21
TECPR1	3	990, 2930, 11569	0.04551	2.21
NAA25	2	13007, 315	0.03444	2.2
KIAA1161	4	2679, 14095, 3013, 1102	0.008519	2.19
ZC3H12C	2	534, 11741	0.06012	2.19
PTPN13	2	4678, 3866	0.03755	2.18
C6orf165	3	4216, 7256, 2066	0.04216	2.18
OTUB2	3	2712, 1455, 10978	0.05294	2.18
DISP1	2	1106, 9511	0.1327	2.18
IL18BP	3	1222, 12381, 2565	0.03585	2.16
LTB4R	4	9743, 3074, 1983, 4246	0.04706	2.16
KRTAP20-1	3	6955, 735, 7766	0.05005	2.16
C9orf3	3	9606, 429, 6615	0.08413	2.16
GGT1	2	1196, 9484	0.1321	2.16
SLC2A2	4	3272, 2237, 6458, 6515	0.01451	2.14
GAGE12I	3	9669, 479, 6660	0.08542	2.14
BHLHE41	2	8102, 1867	0.1016	2.14
CYCS	2	4565, 4375	0.03575	2.13
KLHL30	2	4131, 4853	0.04024	2.13
LYPD3	2	5197, 3832	0.04582	2.13
RIF1	2	654, 11857	0.0677	2.13
CYB5R2	2	6971, 2527	0.07847	2.13
ABCD1	3	4088, 5992, 3568	0.02536	2.12
PLD5	3	287, 13014, 5286	0.06423	2.12
DENND4C	3	2671, 2288, 10265	0.07098	2.12
ANKRD13A	3	3132, 1577, 11421	0.06067	2.1
TRMT5	3	5059, 866, 10597	0.1036	2.1
PUS3	3	3274, 504, 15183	0.02491	2.09
RGR	2	9557, 1419	0.1338	2.09
OR7D2	2	10515, 1144	0.1241	2.08
GKN2	3	237, 21618, 921	0.01296	2.07
FAM169B	3	813, 13761, 3459	0.03856	2.07
KRTAP5-7	2	3977, 5445	0.05003	2.07
TOX3	3	7966, 3383, 3373	0.05336	2.07
NCKAP5L	2	3068, 6634	0.07178	2.07
MBD3L2	2	13230, 541	0.04686	2.06
TERF2	2	771, 12186	0.0725	2.06
ERICH1	2	7424, 2646	0.08754	2.06
TOPORS	3	8263, 6608, 1263	0.0585	2.05
FBXO3	2	11383, 996	0.09816	2.05
OR10P1	4	3650, 1609, 14690, 2845	0.01344	2.04
SDR9C7	2	420, 14171	0.03291	2.04
SCAMP3	3	4026, 8308, 2879	0.05929	2.04
DOK2	2	2704, 7538	0.08985	2.04
ACTBL2	3	4878, 4599, 5175	0.01688	2.03
ZNF630	4	350, 10652, 14227, 1483	0.02024	2.03
ATP13A3	3	13872, 74, 8403	0.03874	2.03
SSBP4	2	3188, 6821	0.07539	2.03
TOM1L1	3	8211, 9965, 453	0.09162	2.03
VPS29	2	16129, 194	0.01466	2.02
OR6B2	2	11458, 1078	0.1035	2.02
CRY1	3	5172, 10933, 1151	0.1113	2.02
ARSG	3	2373, 6501, 6715	0.03438	2.01
TTC39C	3	4148, 7210, 3776	0.04147	2.01
OR4F15	3	2818, 8145, 4639	0.05641	2.01
POMT2	2	4155, 5851	0.05721	2.01
POLR2L	3	8465, 8565, 739	0.06385	2.01
LOC102724957	2	12129, 936	0.08388	2.01
KLK2	2	1002, 11940	0.09146	2.01
WASF2	2	1533, 10217	0.1491	2.01
HUNK	3	1001, 15474, 2739	0.02176	2
GPX2	3	13634, 4512, 769	0.05852	2
CD53	2	823, 12671	0.07029	2
MANBA	3	2407, 3144, 11248	0.07411	2
NFKBIL1	2	1848, 9695	0.137	2
MCM10	2	10137, 1676	0.1473	2
C14orf93	2	16228, 213	0.01602	1.99
SH2D4A	2	5613, 4515	0.05291	1.99
MYBBP1A	2	9116, 2147	0.1239	1.99
LAMTOR2	2	1724, 10036	0.1449	1.99
SLC1A3	3	1291, 27021, 86	0.02396	1.97
RPL7L1	2	4728, 5570	0.05212	1.97
EXPH5	2	5666, 4623	0.05386	1.97
NOS2	3	5632, 9789, 1680	0.08798	1.97
WDFY4	2	2161, 9283	0.1276	1.97
ANKMY2	2	9913, 1901	0.142	1.97
NPY1R	2	5250, 5107	0.04669	1.96
ACER2	3	13841, 4656, 819	0.06106	1.96
ZNHIT6	2	1259, 11621	0.1141	1.96
SPPL2B	2	9805, 2011	0.1395	1.96
SAMD4B	2	4581, 5865	0.05746	1.95
DLK1	2	4178, 6346	0.06625	1.95
TSPAN8	2	6444, 4120	0.06814	1.95
CSTA	4	10705, 9160, 3195, 1086	0.07095	1.95
CMA1	2	3679, 6973	0.07851	1.95
FAM53B	4	9220, 3086, 752, 12027	0.09665	1.95
PPP1R14D	3	6491, 12543, 596	0.1081	1.95
RNF224	2	2401, 9103	0.1236	1.95
UQCRFS1	2	6581, 4056	0.07075	1.94
RGS19	3	12170, 1007, 5588	0.1037	1.94
DENR	2	2410, 9115	0.1238	1.94
ZNF883	4	4735, 4769, 17160, 390	0.02007	1.93
DLGAP3	2	369, 15749	0.02187	1.93
MAGEC3	3	535, 13067, 6684	0.1056	1.93
SLCO1B7	3	1547, 10843, 5449	0.111	1.93
MKLN1	3	1227, 19169, 1219	0.01554	1.92
UNK	3	3633, 148, 19723	0.03721	1.92
SYPL1	3	6351, 9431, 1785	0.08055	1.92
HES1	2	20612, 16	0.01743	1.91
PAGE2B	4	2588, 3225, 14225, 4027	0.02173	1.91
DCAF17	4	6217, 948, 17159, 2280	0.04004	1.91
TRAPPC11	2	4212, 6657	0.07222	1.91
ZNF572	3	1976, 11694, 4564	0.1032	1.91
UBE2A	2	10401, 1986	0.1534	1.91
SIM2	4	2209, 6110, 3121, 12585	0.06192	1.9
OLIG1	4	8452, 2505, 1656, 12256	0.104	1.9
NDFIP1	2	16196, 374	0.0231	1.89
HAUS5	3	25182, 1799, 150	0.03156	1.89
SCGB2A2	2	5545, 5370	0.0517	1.89
AGPAT5	2	11015, 1820	0.1644	1.89
DSCR3	3	1565, 849, 19904	0.02206	1.88
CBLL1	3	5456, 4856, 6308	0.02905	1.88
FILIP1	4	1574, 9512, 3508, 10004	0.05833	1.88
TSR2	2	7712, 3658	0.09347	1.88
ESYT2	3	6844, 203, 16220	0.07708	1.87
SLC22A4	2	7254, 4057	0.08415	1.87
FAM205A	2	11654, 1652	0.1404	1.87
POC5	2	9943, 2406	0.1427	1.87
PITPNM1	3	27759, 268, 1019	0.03169	1.86
MAMLD1	4	9021, 6001, 11122, 550	0.07936	1.86
FBXL20	3	1246, 8134, 9850	0.08927	1.86
NPR1	2	9320, 2813	0.1284	1.86
STUB1	2	2805, 9342	0.1289	1.86
SLC16A9	3	6270, 6146, 4586	0.02861	1.85
MCF2L2	2	818, 14441	0.0518	1.85
EIF3I	2	7575, 3994	0.09059	1.85
OCA2	2	11609, 1760	0.1488	1.85
MAP3K3	2	2087, 10773	0.1622	1.85
SNAP47	4	582, 23841, 2408, 3495	0.03151	1.84
SLC10A6	3	4389, 15603, 1003	0.0472	1.84
SLC2A4	3	8688, 1944, 7959	0.06608	1.84
RTP2	2	1170, 13335	0.08405	1.84
AQP4	2	8165, 3640	0.103	1.84
ZNF438	3	11020, 2266, 5291	0.1151	1.84
TCP11	2	3088, 9053	0.1225	1.84
C15orf56	3	17, 16618, 11168	0.01073	1.83
CLPSL2	4	3992, 271, 25850, 2642	0.03958	1.83
HES2	2	5979, 5521	0.05951	1.83
TMEM55A	3	5314, 10360, 2734	0.1003	1.83
CHST11	2	9730, 2763	0.1377	1.83
CPEB1	2	11617, 1874	0.1561	1.83
RASAL3	2	24173, 9	0.02253	1.82
INTS6	3	6287, 1500, 11932	0.1369	1.82
C19orf25	3	2770, 307, 21048	0.04054	1.81
TSTD3	3	4392, 14773, 1449	0.05885	1.81
SAP25	2	4637, 7168	0.08247	1.81
TFEC	2	11558, 1989	0.1651	1.81
ITGAE	3	7324, 3600, 6985	0.0432	1.8
DRC7	2	2187, 11203	0.1724	1.8
KRT38	3	640, 23479, 1350	0.03349	1.79
ADAM19	2	696, 15629	0.03689	1.79
TMEM53	3	33961, 922, 118	0.04881	1.79
DTWD2	2	14419, 1029	0.063	1.79
CASK	4	39736, 51, 2242, 2398	0.06663	1.79
ARFIP2	2	8329, 3898	0.1064	1.79
LAMA4	2	3783, 8443	0.1089	1.79
PYURF	2	822, 15250	0.04525	1.78
MFSD2A	2	7808, 4396	0.09543	1.78
NLRP13	3	11753, 3836, 3608	0.1056	1.78
SNAPC5	2	11128, 2315	0.1707	1.78
SREBF2	2	21505, 30	0.02559	1.77
RPL17	2	18784, 193	0.02804	1.77
ATXN7L1	3	7352, 3570, 7511	0.04612	1.77
DMRTC2	3	82, 4305, 22689	0.06156	1.77
ATG16L1	3	14714, 5350, 1282	0.07821	1.77
BCAT1	2	1245, 13930	0.08107	1.77
MGST2	3	5727, 12875, 1831	0.1188	1.77
ARHGAP24	2	2614, 10675	0.1599	1.77
NAA40	2	2171, 11605	0.1771	1.77
UBE3C	3	4982, 16950, 789	0.06064	1.76
SENP1	3	924, 15899, 5437	0.06481	1.76
LOC100506422	4	908, 2129, 18315, 8525	0.0699	1.76
PRR20E	3	12071, 732, 9280	0.1405	1.76
CHP1	2	3139, 9875	0.1412	1.76
LGALS3BP	2	7976, 4504	0.09897	1.75
SPESP1	2	4007, 8577	0.1118	1.75
ZNF106	3	6018, 11412, 2452	0.1243	1.75
CENPF	2	3456, 9461	0.1316	1.75
THYN1	2	2089, 11980	0.1649	1.75
IL15RA	2	15895, 763	0.03838	1.74
C11orf53	3	10628, 8177, 1699	0.1062	1.74
ABCA1	2	9136, 3699	0.1243	1.74
APOBEC3A	2	9212, 3653	0.126	1.74
FRG2	2	12450, 1979	0.1468	1.74
LYRM5	2	935, 15372	0.049	1.73
PHTF2	3	199, 32104, 1191	0.05433	1.73
ERMAP	3	4273, 4358, 10997	0.1146	1.73
MPV17	3	1020, 23435, 1249	0.0374	1.72
KRTAP3-1	3	15762, 3787, 2133	0.04643	1.72
TMEM170B	4	2183, 8973, 9407, 6056	0.0485	1.72
RRM2	2	14815, 1105	0.06315	1.72
RASAL1	2	6343, 6184	0.06619	1.72
SCRN2	2	14052, 1380	0.08708	1.72
EPHX2	2	4768, 7887	0.09711	1.72
CXCL17	3	14711, 6520, 1055	0.1017	1.72
PHGDH	2	3212, 10250	0.1499	1.72
MLX	4	68, 4680, 28558, 4839	0.05334	1.71
GRAMD1C	2	5221, 7394	0.08692	1.71
STARD9	3	10249, 2640, 7166	0.09775	1.71
ZNF439	2	8079, 4758	0.1011	1.71
SLC17A6	3	502, 9402, 14033	0.1034	1.71
CLIC2	3	13600, 5444, 2114	0.1067	1.71
TMED6	2	8466, 4444	0.1094	1.71
CMC1	2	9621, 3636	0.1352	1.71
SLC35G2	4	2630, 10481, 20688, 142	0.04433	1.7
GPIHBP1	2	3344, 10215	0.1491	1.7
PPP1R16A	3	15306, 24, 14543	0.006241	1.69
SH3TC2	3	14783, 91, 12812	0.02015	1.69
LGALS8	4	1963, 8917, 8333, 8042	0.04113	1.69
ZFX	3	2122, 29594, 174	0.06097	1.69
YTHDC1	2	6193, 6566	0.07046	1.69
EFR3B	3	16349, 589, 7172	0.09915	1.69
SLMAP	3	415, 7098, 17317	0.09934	1.69
TEX26	2	12040, 2425	0.1856	1.69
CTDNEP1	2	6534, 6364	0.06985	1.68
VIP	3	6504, 3939, 9366	0.0792	1.68
TEX11	3	14185, 6809, 1316	0.1215	1.68
ANKRD26	4	3320, 1812, 18606, 5821	0.05243	1.67
UGDH	3	5835, 8054, 5696	0.0549	1.67
TMEM82	3	20339, 3947, 512	0.06546	1.67
HSD17B2	3	3674, 6898, 9489	0.08176	1.67
TSC22D3	3	2291, 12356, 6569	0.1477	1.67
KIAA0319	2	2376, 12406	0.174	1.67
TTC16	4	16836, 5173, 7485, 907	0.06613	1.66
MCM4	2	4259, 9232	0.1264	1.66
LCAT	2	5492, 7685	0.09286	1.65
ACCS	2	1909, 13684	0.1215	1.65
DDX28	2	497, 18152	0.04222	1.64
C10orf107	3	2968, 3828, 15398	0.05632	1.64
PDE10A	3	1410, 33496, 215	0.07266	1.64
NXF3	3	9425, 4461, 6375	0.08045	1.64
KCNB2	4	1304, 10663, 3366, 15257	0.08851	1.64
GPBP1L1	2	3436, 10649	0.1593	1.64
HERPUD2	2	572, 17936	0.04465	1.63
IL2	4	677, 4494, 27299, 3032	0.07066	1.63
HACL1	3	35262, 830, 351	0.07674	1.63
NOSTRIN	4	6823, 1295, 19700, 3035	0.07863	1.63
PCGF1	2	8044, 5431	0.1004	1.63
TMBIM1	4	1678, 9479, 12395, 5788	0.1073	1.63
SEPW1	2	11838, 2862	0.1875	1.63
ATP13A5	3	15360, 3915, 3110	0.05994	1.62
TAS2R4	3	13385, 662, 10875	0.1106	1.62
TMEM59L	2	16446, 1023	0.05424	1.61
NEK4	3	332, 2585, 27754	0.07455	1.61
C11orf70	3	1159, 18026, 5082	0.07982	1.61
CDX4	3	10637, 7296, 3330	0.1064	1.61
MALRD1	2	2012, 13860	0.1253	1.61
WDR66	2	4493, 9540	0.1334	1.61
TSTA3	2	12464, 2690	0.1937	1.61
TCEAL5	2	12230, 2801	0.197	1.61
CAMTA2	2	18677, 465	0.0462	1.6
ZNF563	3	4100, 8116, 8678	0.06589	1.6
PARS2	2	7407, 6202	0.08719	1.6
AFG3L2	2	9183, 4766	0.1253	1.6
AIF1	3	1174, 14359, 8301	0.1573	1.6
DERL1	2	434, 18912	0.04682	1.59
ZNF735	3	3623, 15647, 3473	0.05374	1.59
SPINK7	3	4046, 4909, 12909	0.1301	1.59
RXRB	2	2957, 12193	0.1961	1.59
BCL2L2-PABPN1	3	1183, 2057, 23255	0.06176	1.58
LAMP1	4	7174, 14801, 6430, 1783	0.07343	1.58
S100A3	4	3782, 5463, 611, 24792	0.07966	1.58
IL23A	3	125, 701, 41014	0.115	1.58
ACVRL1	2	10849, 3822	0.164	1.58
MAPKAP1	2	3626, 11092	0.1698	1.58
MTMR3	2	3462, 11310	0.1749	1.58
PGM2	2	12501, 2808	0.2014	1.58
SLC16A8	4	6167, 6732, 1648, 16471	0.0594	1.57
PRPH	3	452, 14415, 11752	0.06848	1.57
IL15	3	17537, 4267, 2151	0.07002	1.57
SCAF4	3	17346, 372, 9235	0.08555	1.57
ARL17B	3	5859, 17219, 1308	0.09347	1.57
CIB4	3	8601, 16992, 563	0.1187	1.57
HELB	2	5154, 9112	0.1238	1.57
LYPD6	2	13837, 2250	0.14	1.57
IFNL2	2	13686, 2316	0.1463	1.57
HGSNAT	2	2835, 12591	0.2012	1.57
OR5D16	2	49, 24644	0.04309	1.56
E2F2	2	17131, 970	0.05851	1.56
SYT8	2	4240, 10425	0.154	1.56
DIRC2	2	12202, 3160	0.1963	1.56
FAM35A	2	18402, 638	0.05349	1.55
KRTAP9-9	4	6010, 19782, 2511, 2911	0.07306	1.55
OR4L1	4	7100, 7924, 10943, 3252	0.0756	1.55
BIRC7	3	7888, 97, 21019	0.07621	1.55
TRIM22	2	5638, 8628	0.1129	1.55
KLK3	3	3046, 10157, 9352	0.09575	1.54
DEPDC4	4	9096, 22995, 2343, 676	0.1031	1.54
CAPZA3	4	12685, 3891, 5125, 8118	0.1142	1.54
DLL1	2	2464, 13690	0.1555	1.54
CACNG8	2	3447, 11927	0.1897	1.54
SLC22A6	3	4141, 1490, 19294	0.08064	1.53
TMEM91	3	890, 2915, 23485	0.08068	1.53
CDK5R1	2	15357, 1756	0.08926	1.53
TTPAL	3	11249, 3694, 7346	0.1205	1.53
C15orf32	4	10258, 18295, 5043, 623	0.1298	1.53
DDX17	2	21791, 129	0.04849	1.52
SSU72	2	384, 19692	0.05295	1.52
POTEG	2	17505, 992	0.06394	1.52
SEC22C	4	5135, 10436, 9168, 4906	0.06592	1.52
SRP9	2	15775, 1642	0.07909	1.52
LMOD2	2	6983, 7437	0.0878	1.52
ZDHHC5	3	616, 3651, 23866	0.09338	1.52
TSHR	2	5963, 8617	0.1127	1.52
LCE3C	3	2450, 6377, 15005	0.1214	1.52
CHURC1	2	9061, 5595	0.1227	1.52
IPMK	3	11975, 6314, 4219	0.138	1.52
GLCE	2	944, 17839	0.0645	1.51
COG2	3	23956, 1677, 1894	0.06975	1.51
ABHD14B	3	5055, 3011, 15767	0.08396	1.51
KCNA1	2	15659, 1723	0.08428	1.51
COL18A1	4	10567, 23454, 3647, 172	0.08782	1.51
LUC7L2	3	10404, 3657, 8537	0.1012	1.51
OR4N4	2	9337, 5407	0.1288	1.51
TRABD	4	2480, 3342, 9962, 16469	0.1301	1.51
C1orf226	2	11947, 3617	0.1902	1.51
COPZ2	4	3036, 15626, 14240, 1349	0.0496	1.5
RBM22	2	513, 19293	0.05746	1.5
USP44	2	6834, 7756	0.09436	1.5
DNAJB6	2	8048, 6628	0.1005	1.5
BMPR2	4	8839, 93, 33663, 2489	0.1119	1.5
USE1	2	5804, 9020	0.1218	1.5
ZC3H6	3	5389, 11485, 5745	0.1261	1.5
PLAC1	3	12009, 6099, 4700	0.1389	1.5
SCNM1	2	3395, 12486	0.2032	1.5
KRT10	4	319, 29650, 17519, 135	0.01393	1.49
RPL4	3	3586, 10110, 9263	0.0947	1.49
NAGA	2	6670, 8140	0.1025	1.49
NFYC	2	6441, 8348	0.1068	1.49
RBBP7	2	6394, 8380	0.1075	1.49
EPPK1	4	2055, 37442, 2116, 1891	0.1188	1.49
B4GALT5	2	2826, 13620	0.1787	1.49
RALGPS2	2	12002, 3757	0.1914	1.49
TPRX1	2	3020, 13202	0.2003	1.49
KRTAP10-8	3	4415, 15290, 4270	0.08303	1.48
LY6G6C	3	10067, 5695, 6774	0.09378	1.48
DKK1	3	2595, 16417, 5551	0.09697	1.48
TCEAL8	2	8039, 6802	0.1003	1.48
TANGO2	3	298, 24149, 5307	0.1206	1.48
MFSD6	2	5644, 9404	0.1302	1.48
C4orf3	4	13777, 8760, 3583, 5168	0.1389	1.48
GPRIN2	2	4779, 10544	0.1568	1.48
LRIF1	2	16808, 1409	0.07801	1.47
SEC22A	2	15654, 1933	0.094	1.47
C5orf45	2	7072, 7825	0.09576	1.47
STX12	2	6224, 8860	0.1182	1.47
HECA	2	5422, 9833	0.1402	1.47
MYCBP2	2	2550, 14382	0.1473	1.47
SELV	2	11841, 4011	0.1876	1.47
KLHL26	3	47050, 72, 251	0.2134	1.47
PTBP2	2	6211, 8990	0.1211	1.46
TPRG1L	3	7182, 19935, 518	0.1413	1.46
IMPACT	2	11574, 4230	0.1812	1.46
PGK1	2	3842, 12288	0.1985	1.46
RNF214	2	18289, 976	0.0729	1.45
GPX7	3	7590, 9563, 5747	0.08326	1.45
COG1	2	8588, 6653	0.1121	1.45
C16orf96	2	14792, 2428	0.133	1.45
MYL12A	3	3857, 5834, 14366	0.1351	1.45
OR52A5	2	23028, 151	0.05822	1.44
TBCK	2	19818, 510	0.06476	1.44
LRP6	3	28309, 2142, 1129	0.09996	1.44
TEX13B	3	37035, 774, 797	0.1203	1.44
TIMM17B	2	4247, 11904	0.1891	1.44
COQ5	2	24818, 105	0.05944	1.43
NR3C1	2	1752, 16544	0.09167	1.43
ARFGEF1	3	1390, 28860, 1738	0.09628	1.43
LIPA	3	2622, 923, 28163	0.1082	1.43
CXorf58	3	36945, 468, 1332	0.131	1.43
NSFL1C	4	2476, 23339, 1192, 9146	0.1389	1.43
HNRNPD	2	10125, 5534	0.147	1.43
EVA1B	2	2680, 14547	0.1519	1.43
AMOTL1	2	4334, 11795	0.1865	1.43
TRIB1	2	13896, 3071	0.1886	1.43
TPI1	2	11954, 4257	0.1903	1.43
AGR3	3	10924, 3905, 9225	0.1129	1.42
SVOPL	3	11816, 3851, 8494	0.134	1.42
OR6N1	3	21055, 7093, 394	0.1496	1.42
RAB38	2	5234, 10633	0.1589	1.42
SDCCAG8	2	14344, 2853	0.1662	1.42
OR4S1	4	33414, 1777, 1239, 6081	0.1798	1.42
TIAF1	3	8336, 2635, 14166	0.1954	1.42
TMEM206	4	103, 15146, 18072, 6894	0.06368	1.41
CALCOCO1	2	871, 18871	0.07545	1.41
POPDC3	2	18167, 1163	0.08258	1.41
MAGEL2	3	5844, 7518, 10155	0.0957	1.41
TLR2	3	809, 3431, 26713	0.1189	1.41
CDC42EP1	2	1326, 17787	0.08622	1.4
WDR59	2	17269, 1536	0.09092	1.4
PRKCG	3	15958, 4948, 4202	0.09236	1.4
DGKQ	3	7769, 4519, 12022	0.1392	1.4
MAP1A	3	6103, 20816, 757	0.14	1.4
CEP350	3	15521, 2566, 7414	0.1472	1.4
AGPAT3	2	2838, 14601	0.1602	1.4
BEX1	3	10424, 1815, 14005	0.1911	1.4
NME7	2	12124, 4408	0.1944	1.4
TMEM39A	3	3995, 16861, 4615	0.0919	1.39
TNFRSF25	3	1806, 27457, 1844	0.09795	1.39
TSPAN32	3	10510, 4808, 8858	0.1036	1.39
METTL15	3	9068, 10589, 4587	0.1053	1.39
MORF4L2	3	5806, 11063, 7057	0.1161	1.39
SUCLG2	2	24524, 146	0.06595	1.38
TESK1	2	777, 19403	0.07864	1.38
RABGGTB	2	2174, 16115	0.107	1.38
DYNAP	3	28552, 2761, 1040	0.1223	1.38
SAXO2	3	2331, 865, 31284	0.1268	1.38
TENM3	3	17617, 6255, 2348	0.1287	1.38
KIAA0513	4	4866, 27316, 6446, 780	0.1379	1.38
ZCCHC18	3	4052, 13502, 7304	0.1776	1.38
RAPGEF3	2	13676, 3480	0.2183	1.38
GCSAML	2	20211, 583	0.0768	1.37
ZNF674	3	12462, 15761, 740	0.08238	1.37
MUC4	3	23467, 120, 9004	0.08704	1.37
LRTM2	2	7410, 8461	0.1093	1.37
RBM34	3	1860, 35211, 615	0.1414	1.37
GNPTG	3	9760, 1098, 16994	0.1681	1.37
STXBP5L	4	1974, 4524, 1124, 38519	0.2109	1.37
DYM	2	3847, 13252	0.2221	1.37
LTBP1	2	131, 25742	0.06957	1.36
MOG	2	443, 20833	0.07457	1.36
DNALI1	4	7674, 802, 13135, 15325	0.1753	1.36
PRDM15	2	3797, 13423	0.2263	1.36
C21orf2	4	11702, 10374, 2658, 9560	0.09158	1.35
ENTPD2	2	15822, 2534	0.1227	1.35
SNCAIP	3	5612, 7495, 11527	0.1271	1.35
UBP1	2	15161, 2824	0.1491	1.35
CRNN	3	8127, 421, 21044	0.1537	1.35
PRPS1L1	3	15287, 3197, 7310	0.1592	1.35
COX6B2	4	34673, 1616, 3075, 4031	0.1609	1.35
MRPS15	3	6904, 253, 25170	0.1701	1.35
NXF5	4	4542, 33831, 6902, 247	0.1817	1.35
LZIC	4	3601, 8744, 26658, 812	0.1944	1.35
PRPS1	3	8455, 14671, 2855	0.1987	1.35
TRIL	2	8437, 7810	0.1088	1.34
GLYATL2	4	35163, 3442, 62, 10865	0.1259	1.34
SPTSSB	3	2542, 31909, 857	0.143	1.34
APPBP2	3	5499, 5846, 13931	0.1662	1.34
RNF222	4	10932, 4864, 15662, 3289	0.1734	1.34
TDRD12	2	3867, 13543	0.2293	1.34
UBXN4	3	20065, 179, 11573	0.05832	1.33
NDEL1	2	1064, 19025	0.09172	1.33
TMEM45A	2	7571, 8821	0.1172	1.33
TNFSF4	2	7105, 9332	0.1286	1.33
PPY	3	19550, 569, 9439	0.135	1.33
RASSF7	4	6421, 12393, 13799, 2487	0.1424	1.33
DDX52	3	972, 2698, 30988	0.1433	1.33
SIMC1	4	29223, 7154, 3941, 938	0.1801	1.33
NUDT10	3	8999, 3147, 13975	0.1903	1.33
MAP2K2	3	9795, 7653, 7344	0.08811	1.32
NPL	3	20759, 1868, 4817	0.1373	1.32
NCF4	3	609, 2744, 33733	0.1589	1.32
SLAIN2	4	2981, 8005, 24625, 2091	0.1832	1.32
PRDX3	3	9381, 15309, 2355	0.2062	1.32
CSNK2A1	2	12714, 4636	0.2088	1.32
MRPS18C	2	14111, 3705	0.2221	1.32
ATP6V1H	3	233, 12544, 19216	0.05253	1.31
OR52R1	3	7604, 6378, 11129	0.1177	1.31
ABHD1	2	2892, 15513	0.1466	1.31
TBC1D31	2	10942, 5941	0.1662	1.31
NCAN	2	12990, 4489	0.2156	1.31
PAK7	4	4525, 38127, 2143, 1583	0.2248	1.31
CCDC22	2	13916, 3876	0.2366	1.31
MROH9	3	17735, 13422, 381	0.05188	1.3
PLIN2	4	12446, 226, 17486, 10745	0.07212	1.3
RNF141	4	7332, 10426, 11557, 4826	0.08841	1.3
MAN1C1	4	15296, 1345, 5723, 15072	0.1193	1.3
MAPK14	4	29422, 11572, 387, 3051	0.1275	1.3
CBX6	3	2601, 1809, 27796	0.1333	1.3
NAPEPLD	4	7853, 17843, 1387, 9747	0.1465	1.3
C2CD2L	2	10301, 6626	0.1511	1.3
BRCC3	2	10430, 6507	0.1541	1.3
OR4C3	3	15409, 7992, 3184	0.1783	1.3
KRT83	3	33736, 162, 4933	0.1804	1.3
GRM5	3	9639, 1761, 16710	0.2043	1.3
ZNF114	2	3848, 14157	0.2291	1.3
ACTG1	2	17885, 1784	0.1138	1.29
MICALL2	3	2409, 1352, 30794	0.1451	1.29
GXYLT1	3	12476, 6550, 6724	0.1507	1.29
ASCC2	3	12725, 6583, 6396	0.1573	1.29
A3GALT2	4	18506, 3260, 9663, 4407	0.1684	1.29
SUV39H2	3	15917, 2932, 8254	0.1757	1.29
SCN2B	3	23582, 7012, 524	0.1859	1.29
LSM8	3	5884, 6221, 13915	0.1862	1.29
TAS2R42	3	620, 7838, 21317	0.1927	1.29
AMPD2	2	14666, 3542	0.1999	1.29
FCRLB	2	12794, 4811	0.2107	1.29
MC1R	3	9565, 8543, 7350	0.08331	1.28
NFATC3	2	8620, 8266	0.1127	1.28
DCDC2	4	11283, 6398, 26496, 122	0.1536	1.28
PRDM8	3	7461, 2603, 17512	0.17	1.28
PTGER1	3	2344, 7432, 17982	0.1719	1.28
LPPR5	3	297, 26429, 7198	0.1854	1.28
RNF26	4	8809, 39801, 1118, 668	0.216	1.28
KRT37	2	14409, 3773	0.2188	1.28
HSFY2	3	2277, 43831, 65	0.2269	1.28
MAP7	2	282, 23939	0.08571	1.27
TIGD4	3	5130, 4816, 17012	0.1186	1.27
HIBCH	2	2382, 16980	0.1319	1.27
IQCC	2	7520, 9507	0.1326	1.27
CCDC77	3	2416, 37443, 457	0.1903	1.27
IZUMO2	3	7668, 1022, 20424	0.1923	1.27
FAM71A	2	13297, 4629	0.2231	1.27
RAB7B	3	10953, 15341, 1973	0.2277	1.27
GAPVD1	2	22295, 416	0.09064	1.26
UPB1	2	18823, 1461	0.1135	1.26
ACRV1	4	8573, 3463, 16023, 7622	0.1196	1.26
LIPG	2	8135, 9014	0.1216	1.26
FAP	2	7745, 9397	0.1301	1.26
FYB	2	16587, 2633	0.1388	1.26
C20orf194	3	22189, 4272, 2021	0.1488	1.26
MAS1L	3	12213, 2880, 12516	0.1518	1.26
KRT72	2	6242, 11149	0.1712	1.26
KCND3	4	1184, 10000, 33199, 1679	0.1763	1.26
TRIM44	2	15186, 3391	0.1806	1.26
SACS	3	2782, 35521, 591	0.1863	1.26
GLOD5	4	7299, 3796, 26572, 2061	0.1905	1.26
CD96	3	597, 39040, 1747	0.1994	1.26
GPM6A	2	154, 27420	0.08708	1.25
FAM46D	3	1223, 16699, 11813	0.1437	1.25
C10orf55	3	977, 2977, 32406	0.1747	1.25
SDF2	2	15208, 3502	0.1863	1.25
MARK1	4	11251, 8765, 10574, 4761	0.08203	1.24
MID2	4	10638, 6370, 6707, 11355	0.08411	1.24
FAM50A	2	24816, 269	0.09036	1.24
PFDN4	3	5708, 9905, 10792	0.1098	1.24
RAD21	2	19355, 1257	0.1113	1.24
TMEM98	4	6422, 9135, 13274, 6514	0.1288	1.24
MPRIP	3	21113, 4153, 2796	0.1424	1.24
NUDT14	3	1110, 29537, 3770	0.176	1.24
LOC283710	4	6980, 4833, 686, 32682	0.2141	1.24
DNAJC8	2	3882, 14707	0.2185	1.24
NEK3	3	9629, 8411, 8105	0.0846	1.23
DOCK6	2	37266, 7	0.08848	1.23
INTS5	2	20914, 731	0.1032	1.23
C14orf105	4	21686, 13251, 1093, 3438	0.1205	1.23
DEFB115	3	3062, 2317, 26033	0.1474	1.23
SLITRK1	4	40094, 12011, 219, 1317	0.1546	1.23
CT55	3	31114, 2272, 1851	0.1593	1.23
ZNF226	3	3512, 26578, 1862	0.1609	1.23
RAB6C	4	3179, 5180, 3445, 30097	0.1773	1.23
NOTO	3	26515, 5450, 876	0.1887	1.23
ATP10B	4	9745, 6226, 21107, 1175	0.1983	1.23
KDELC1	2	12432, 5608	0.2019	1.23
OGFR	2	22769, 447	0.09784	1.22
FAM160B1	3	10992, 9811, 5970	0.1145	1.22
ZNF48	2	17414, 2420	0.1421	1.22
OTX1	3	20253, 4404, 3358	0.143	1.22
HLA-DQB1	2	17281, 2493	0.1439	1.22
BICD2	2	2974, 16372	0.1543	1.22
CDC25B	2	10468, 7207	0.155	1.22
TSHB	3	27624, 1658, 3607	0.1701	1.22
AQP3	2	3410, 15687	0.1725	1.22
EFNA1	2	6495, 11377	0.1765	1.22
CYP4A11	3	367, 25456, 8083	0.1815	1.22
SATL1	3	1103, 29892, 3871	0.1842	1.22
GALNT7	4	10121, 1969, 29904, 1955	0.1858	1.22
NPVF	2	6044, 11882	0.1886	1.22
USP6	2	13734, 4730	0.234	1.22
TMEM217	3	715, 700, 43343	0.2384	1.22
OR8G1	3	11330, 214, 21677	0.08376	1.21
GFRA1	2	25144, 306	0.0983	1.21
ACY1	2	492, 22530	0.1006	1.21
MEX3D	3	10394, 8951, 7349	0.101	1.21
KCNV1	4	12593, 12779, 5626, 5483	0.1166	1.21
C10orf91	4	4137, 5327, 5054, 22527	0.1284	1.21
VPREB3	3	6428, 8762, 11738	0.1321	1.21
JRKL	3	7515, 47, 35296	0.1423	1.21
FXYD3	2	6992, 10793	0.1627	1.21
CELA2A	3	6847, 4362, 16596	0.1644	1.21
RBM8A	2	15810, 3371	0.1682	1.21
NAB2	4	1725, 6365, 13805, 17002	0.1758	1.21
SLC25A37	4	24264, 1339, 6265, 7708	0.1793	1.21
CASP14	4	12503, 13109, 187, 17774	0.05153	1.2
BRD2	2	90, 30590	0.09403	1.2
HMP19	4	34173, 14028, 1084, 738	0.1003	1.2
NUDT15	2	6513, 11540	0.1804	1.2
WDR3	3	7724, 16020, 4128	0.1807	1.2
FATE1	3	5075, 23624, 1703	0.1824	1.2
SPG20	3	20411, 1879, 6674	0.1928	1.2
GEMIN8	2	13548, 4991	0.2294	1.2
KLF14	3	14838, 1021, 15400	0.08515	1.19
FDXACB1	2	29043, 147	0.09731	1.19
QPCTL	2	20721, 888	0.113	1.19
THEM5	2	3231, 16308	0.1679	1.19
AKAP8L	2	15965, 3432	0.1722	1.19
TENM1	3	11505, 3393, 13535	0.1786	1.19
MOB4	3	1880, 35251, 1478	0.1898	1.19
WISP1	3	8251, 5177, 14249	0.1976	1.19
PABPN1L	3	5231, 980, 27722	0.2015	1.19
C17orf50	2	12436, 5909	0.202	1.19
GDPD3	2	4022, 15108	0.2179	1.19
AKT3	2	13592, 5046	0.2305	1.19
NID2	4	37368, 784, 2434, 8761	0.2725	1.19
SULT4A1	4	404, 3262, 5889, 42770	0.3389	1.19
SLC9A3R1	2	32843, 59	0.09857	1.18
AP1G1	2	9246, 8804	0.1268	1.18
DENND4A	4	5132, 5113, 3803, 25394	0.1464	1.18
SLC24A1	3	11049, 1147, 18649	0.1732	1.18
CSNK1A1L	2	3730, 15666	0.1898	1.18
MMP7	3	3416, 17323, 7840	0.1961	1.18
GFI1B	2	15378, 3869	0.2027	1.18
PTPRJ	2	13821, 5024	0.236	1.18
COX10	4	25941, 15262, 725, 2688	0.09164	1.17
TNIP2	2	104, 30889	0.1012	1.17
ANKFN1	2	26443, 286	0.1051	1.17
LGALS12	2	901, 20902	0.1171	1.17
C7orf62	4	19040, 6474, 5289, 6317	0.1172	1.17
SLC38A9	4	783, 29322, 2553, 13716	0.1256	1.17
RSPH9	4	263, 10304, 9526, 23058	0.161	1.17
ARID2	3	2432, 32848, 1726	0.1895	1.17
PLA2G4B	2	15585, 3825	0.1964	1.17
NTSR1	3	790, 4946, 30808	0.2174	1.17
KRTAP26-1	3	37951, 3291, 422	0.2333	1.17
FEZ1	4	9799, 28126, 456, 6645	0.2407	1.17
CHST5	3	17471, 10134, 2157	0.2429	1.17
C14orf79	4	5302, 15765, 1278, 18512	0.1209	1.16
ZYX	2	19218, 1721	0.1396	1.16
CENPU	2	7620, 10639	0.1591	1.16
CDPF1	4	10719, 14810, 9671, 3058	0.17	1.16
ATP6V1E1	2	15931, 3655	0.1834	1.16
MAN2B2	4	10119, 6804, 17968, 3228	0.1886	1.16
NEUROD1	2	4828, 14311	0.2483	1.16
KIF22	2	542, 23441	0.1132	1.15
LCN15	2	20408, 1132	0.1268	1.15
KBTBD2	2	8235, 10180	0.1483	1.15
CYP1A1	2	7812, 10630	0.1589	1.15
USP17L10	2	18017, 2507	0.1599	1.15
RPS6KC1	2	7418, 11022	0.1681	1.15
ACAP2	3	28340, 2674, 2856	0.1752	1.15
QPRT	3	21702, 4588, 2900	0.1768	1.15
MRPL1	3	10539, 14517, 3859	0.205	1.15
TNFSF13B	4	8197, 4998, 2730, 23169	0.2116	1.15
OCM2	2	13168, 5742	0.22	1.15
ZFP91	4	4071, 2279, 22198, 10819	0.2343	1.15
SLC24A3	3	649, 38656, 2591	0.2406	1.15
SMIM9	4	1780, 584, 5150, 46721	0.4593	1.15
GPRC6A	2	3, 39923	0.104	1.14
HTR6	2	339, 26144	0.1114	1.14
BANF2	2	22284, 683	0.1198	1.14
IGSF11	4	31577, 14224, 3515, 281	0.135	1.14
HIST4H4	2	8558, 9937	0.1426	1.14
ADAM7	4	3377, 14246, 11613, 9243	0.1543	1.14
MAGEA1	4	17929, 6509, 4738, 8881	0.1642	1.14
RPRM	2	7465, 11131	0.1708	1.14
NFIA	3	2453, 26136, 3821	0.1864	1.14
KRTAP13-1	3	19815, 6118, 3124	0.1904	1.14
UGT2A1	4	14821, 8649, 15653, 1401	0.194	1.14
NAB1	3	27553, 1631, 4561	0.2062	1.14
NUDT9	3	500, 43129, 1529	0.2758	1.14
KIAA1024	3	17669, 15949, 495	0.04719	1.13
JRK	4	9541, 9067, 12057, 6838	0.09964	1.13
SAA2-SAA4	2	9605, 8928	0.1349	1.13
LIG1	2	9726, 8887	0.1376	1.13
KIAA0922	4	13680, 7123, 9233, 7385	0.1392	1.13
CEMIP	2	1601, 19626	0.142	1.13
PANK1	3	12319, 9470, 6406	0.1467	1.13
MS4A13	2	3854, 16012	0.1949	1.13
DBF4B	3	1396, 29049, 4559	0.2161	1.13
TH	3	15002, 2789, 12162	0.2182	1.13
GPHA2	2	5926, 13121	0.2189	1.13
CACNA1C	3	2249, 36786, 1230	0.2272	1.13
TMPRSS3	3	858, 29680, 5678	0.2346	1.13
HIST2H2BE	2	4763, 14694	0.2579	1.13
C12orf54	2	201, 29010	0.1125	1.12
VEGFB	2	26108, 377	0.1164	1.12
CRIM1	4	1481, 14118, 24301, 2989	0.1331	1.12
HSPA14	3	13670, 1413, 16597	0.1363	1.12
ASCC1	2	10096, 8625	0.1463	1.12
RFK	2	11008, 7710	0.1678	1.12
SPANXN1	3	6647, 6567, 15506	0.1787	1.12
EFHD1	3	2766, 28326, 3030	0.1864	1.12
IFI16	4	8811, 10641, 3715, 15667	0.1889	1.12
ZNF81	3	13969, 5281, 9514	0.1901	1.12
KCNH4	3	14980, 3999, 10282	0.2176	1.12
OPN5	4	3823, 30190, 2541, 7734	0.2673	1.12
TMEM69	2	285, 27913	0.118	1.11
TDRD1	2	658, 23303	0.125	1.11
HACD2	2	8316, 10543	0.1567	1.11
RHBDD3	4	19900, 13722, 2474, 4310	0.1706	1.11
ZDHHC16	2	11160, 7722	0.1714	1.11
APRT	3	7018, 6014, 15897	0.1801	1.11
POMC	3	4066, 7004, 18361	0.202	1.11
NECAB1	2	13749, 5620	0.2343	1.11
AKR1E2	3	9329, 15581, 4416	0.2344	1.11
HOXD13	3	10739, 16089, 3133	0.2485	1.11
DTD2	3	675, 7869, 26549	0.2561	1.11
SMIM4	3	39906, 5214, 115	0.2744	1.11
ACSBG2	4	6964, 2569, 38287, 1774	0.345	1.11
GPR21	4	119, 3131, 25993, 19708	0.0718	1.1
WFDC13	4	21738, 4091, 15491, 995	0.1223	1.1
OR1S2	3	5540, 11639, 11743	0.1323	1.1
PRRG2	2	20708, 1214	0.1406	1.1
LOC101929983	3	11815, 12489, 4947	0.151	1.1
CYB5B	2	7690, 11252	0.1735	1.1
SLC23A1	3	3675, 3428, 24324	0.1823	1.1
EML2	2	3168, 17368	0.1856	1.1
IL26	4	7611, 8729, 2205, 20888	0.199	1.1
DHRS4L1	4	14360, 6144, 3390, 16075	0.2042	1.1
KDM1A	3	15229, 2925, 12263	0.2246	1.1
SPTBN1	3	6855, 22685, 1669	0.2357	1.1
ARHGAP4	3	11029, 3323, 15652	0.2363	1.1
OR6A2	4	4317, 34494, 4458, 3316	0.2375	1.1
DGAT2L6	3	1448, 1833, 38256	0.2444	1.1
CD28	3	625, 27963, 7559	0.2575	1.1
PLA2R1	4	36585, 5349, 6023, 1091	0.2815	1.1
TAS2R10	2	20938, 1167	0.141	1.09
POLR3B	2	8983, 10087	0.1461	1.09
LY6G5C	3	9924, 5543, 13626	0.1809	1.09
SNX12	4	6189, 16256, 9984, 6322	0.182	1.09
FAM78A	2	6788, 12565	0.2051	1.09
RBMS1	2	4017, 16249	0.2098	1.09
ATG4A	3	1713, 18157, 11823	0.2132	1.09
RIPPLY2	3	1511, 33451, 3226	0.2318	1.09
RNF186	2	13678, 5898	0.2326	1.09
SH3GLB2	4	9550, 1473, 23145, 7147	0.2404	1.09
SIRT6	4	305, 10549, 1138, 45354	0.3071	1.09
CRLF1	2	8906, 10359	0.1525	1.08
DMXL2	2	2031, 19348	0.1639	1.08
MED29	2	7477, 11767	0.1858	1.08
GLRX	4	508, 13983, 20793, 8183	0.1888	1.08
SRD5A2	3	1877, 18688, 10902	0.2559	1.08
C14orf178	3	32373, 845, 5237	0.2569	1.08
FBXO5	4	7300, 15488, 160, 24847	0.1244	1.07
DPH5	2	385, 27210	0.1272	1.07
TFDP2	2	23109, 782	0.1372	1.07
SELK	2	9865, 9449	0.1409	1.07
NDUFB1	3	6746, 10346, 12127	0.1419	1.07
LACTB	2	1417, 20479	0.1521	1.07
TSACC	2	11499, 7824	0.1794	1.07
PNMA5	4	15655, 1629, 16002, 8720	0.2043	1.07
STAT4	4	5204, 35507, 128, 12992	0.2124	1.07
TMEM220	2	15682, 4530	0.2339	1.07
LDHAL6B	3	1602, 33814, 3236	0.2417	1.07
MOV10	4	10985, 3140, 23607, 3622	0.2532	1.07
THTPA	3	1681, 8097, 21396	0.2586	1.07
ZNF746	2	15170, 4957	0.2698	1.07
DHRS2	4	7957, 35095, 1032, 4965	0.3165	1.07
BEX5	2	26792, 442	0.1308	1.06
DIP2C	2	9258, 10123	0.1469	1.06
C6orf201	2	1632, 20232	0.1601	1.06
WIPF3	2	11902, 7647	0.1891	1.06
ZFPL1	2	18069, 3037	0.1937	1.06
ZBTB2	4	685, 20096, 14453, 8208	0.2102	1.06
OR10A2	3	7621, 15408, 6506	0.2169	1.06
ITGA2B	3	4711, 10277, 14992	0.2179	1.06
ACTR3C	3	8150, 5377, 16309	0.2205	1.06
GPSM1	2	6442, 13344	0.2243	1.06
IGFL3	4	14460, 8041, 909, 19656	0.2277	1.06
ARMC6	3	1498, 31740, 4215	0.2478	1.06
CHRND	3	3198, 16168, 11263	0.2507	1.06
TNPO3	3	6678, 953, 28828	0.2656	1.06
DIXDC1	3	21104, 1322, 9415	0.2728	1.06
SLC4A11	4	437, 6681, 35070, 8691	0.3013	1.06
TSPO2	4	428, 6885, 43201, 4133	0.4069	1.06
XRCC6	3	12900, 21165, 455	0.1054	1.05
OR4Q3	4	2377, 26182, 15463, 1751	0.1192	1.05
APOM	4	14730, 920, 14466, 13728	0.13	1.05
CKMT1B	4	31468, 16745, 5426, 71	0.1347	1.05
EIF4E	2	25601, 578	0.1371	1.05
S100PBP	2	24475, 690	0.1408	1.05
FBXO31	2	862, 22991	0.1448	1.05
LTK	2	21538, 1090	0.1484	1.05
TBRG4	4	14038, 2994, 13944, 10058	0.1487	1.05
EXTL1	2	1570, 20369	0.1603	1.05
SLC12A8	2	2208, 19358	0.1761	1.05
SPATA33	4	4343, 7029, 22727, 5861	0.2022	1.05
C1orf186	3	15152, 8926, 5763	0.2225	1.05
GEMIN7	3	4771, 2604, 25995	0.2299	1.05
NINL	3	330, 17399, 18445	0.04782	1.04
CBX4	2	25573, 605	0.14	1.04
ETFA	2	11027, 8575	0.1682	1.04
MAX	2	2791, 18585	0.1921	1.04
SYCE1L	4	15795, 2165, 14861, 9169	0.1982	1.04
WNT16	3	12481, 3603, 14809	0.2129	1.04
AMDHD2	2	5725, 14456	0.2519	1.04
ITGB1	3	33888, 1568, 3589	0.2587	1.04
TMEM212	2	27512, 438	0.1376	1.03
CKLF	3	598, 11280, 22909	0.1617	1.03
COX14	2	11258, 8526	0.1737	1.03
BLOC1S5	2	2033, 19786	0.1762	1.03
PSRC1	3	19149, 4459, 6718	0.2214	1.03
TTC30A	2	13576, 6522	0.2301	1.03
KRT80	3	12239, 17854, 2160	0.2453	1.03
XKR6	3	20872, 7152, 2736	0.2507	1.03
TYW1	3	3467, 8944, 18409	0.2596	1.03
DSPP	3	29829, 7516, 681	0.2864	1.03
CNTNAP1	3	7702, 29282, 719	0.2886	1.03
SLC51A	3	2656, 11262, 17742	0.2954	1.03
TSPEAR	4	2327, 6114, 11309, 21554	0.2978	1.03
CPXM2	4	4824, 5480, 39469, 1567	0.3473	1.03
ASIC5	3	32201, 13531, 23	0.05991	1.02
NAA11	2	218, 30971	0.1356	1.02
MMP19	2	29020, 342	0.1393	1.02
GPR146	2	27317, 489	0.1433	1.02
AP4B1	4	960, 18785, 16952, 7323	0.1863	1.02
DNAJC17	4	3584, 3357, 12484, 22176	0.2239	1.02
KCNJ9	3	1744, 12133, 18807	0.2241	1.02
RNASE2	3	28097, 3865, 3080	0.2321	1.02
TBC1D3B	2	15773, 4884	0.2517	1.02
SYT13	3	21641, 9751, 1215	0.263	1.02
RAB11FIP3	3	30098, 5310, 1561	0.2698	1.02
PNMA1	3	5657, 954, 32533	0.284	1.02
PLEKHF1	3	1038, 42652, 1619	0.3148	1.02
GTF2H4	2	25841, 644	0.1481	1.01
UQCC1	2	23365, 943	0.1557	1.01
KCNE1	4	12248, 35180, 7861, 83	0.1693	1.01
C5orf38	2	11216, 8747	0.1727	1.01
FOXE3	4	6691, 4616, 16194, 13669	0.2101	1.01
RBM27	2	6453, 13912	0.2382	1.01
WNT8B	4	9969, 2043, 18851, 11478	0.2427	1.01
AP3M2	2	6041, 14394	0.2503	1.01
MS4A6E	2	5848, 14576	0.2549	1.01
CARD9	4	25294, 5097, 4287, 7885	0.2581	1.01
AGTPBP1	3	21499, 2639, 7141	0.2628	1.01
KRTAP4-7	3	33225, 5295, 1056	0.2888	1.01
FGF21	4	18114, 18411, 2979, 3550	0.1258	1
PTPRS	2	10129, 9933	0.1471	1
GOLGB1	2	810, 24519	0.1536	1
ZNF721	4	10926, 840, 17869, 15277	0.1543	1
OPN1MW2	3	5057, 12021, 13881	0.1878	1
EMP1	2	3532, 17902	0.2201	1
NTMT1	3	37414, 3545, 1077	0.2984	1
VAT1L	3	7019, 32128, 655	0.3012	1
MVB12B	3	2041, 6565, 25286	0.273	0.9994
UST	2	4039, 17205	0.2333	0.9981
TUBA8	3	1949, 29635, 5149	0.2727	0.9958
NCOR1	2	641, 26265	0.1522	0.9948
RLIM	4	1116, 36522, 12590, 2498	0.2539	0.9928
HSPB6	2	27239, 554	0.1508	0.992
TBC1D13	2	21349, 1403	0.1711	0.9915
PYGL	3	1712, 39046, 2173	0.2946	0.9901
ZNF518B	2	5188, 15747	0.2698	0.9893
TCEAL6	4	1582, 37751, 9770, 2941	0.363	0.9876
ZNF701	3	10861, 12094, 7504	0.141	0.9865
OR2B2	4	9108, 6585, 2194, 27112	0.2959	0.9865
CDK5	2	5509, 15331	0.274	0.9863
MEGF9	4	5660, 1595, 10154, 30131	0.3462	0.9863
TENM2	2	22804, 1089	0.1654	0.9843
ANXA1	2	28663, 439	0.1503	0.9835
CPXCR1	4	14755, 21387, 3972, 2697	0.183	0.9833
KCNJ3	3	17311, 839, 17107	0.0823	0.9826
SEC31A	3	5064, 10617, 15482	0.2316	0.9825
TSPAN7	3	21071, 5895, 4076	0.2413	0.9812
SLC39A14	2	8714, 11638	0.1827	0.9808
FAM64A	3	29436, 2429, 4653	0.2681	0.9808
PTS	4	1362, 16716, 22026, 4284	0.1552	0.98
TLR8	2	12629, 7821	0.2067	0.9783
KRTAP22-2	3	4745, 2155, 30490	0.2775	0.9765
ZNF257	4	2758, 20406, 10993, 7741	0.28	0.9746
CAPN1	2	24346, 939	0.1648	0.9727
ZIM3	2	11530, 8901	0.1801	0.9725
MGA	2	27478, 574	0.1563	0.9721
SEC24D	3	2252, 3312, 34024	0.2774	0.9718
L3MBTL3	3	3986, 21965, 5395	0.2434	0.9712
ZNF2	2	2204, 20034	0.1959	0.9695
GFRA3	2	3558, 18184	0.2296	0.9678
RHOJ	4	5230, 30195, 6559, 4201	0.2813	0.9671
FOLR2	3	12741, 10763, 7354	0.1577	0.9665
GYPA	3	41774, 1043, 2354	0.3373	0.9663
DSCAM	2	785, 25603	0.1632	0.9652
PPP1R14B	2	12999, 7628	0.2158	0.965
TNFRSF17	4	3684, 28867, 4409, 8976	0.331	0.9646
TMEM263	3	28699, 293, 11386	0.152	0.9643
NFIL3	3	2605, 29230, 4703	0.2737	0.9634
FERD3L	3	2936, 18424, 11090	0.3148	0.9623
HOXD12	3	22902, 13300, 451	0.1189	0.962
AKAP10	3	19321, 11740, 2015	0.2705	0.9617
ZNF827	4	1320, 5185, 31367, 11345	0.3363	0.9615
GAS2L2	2	4880, 16500	0.2645	0.961
ARHGEF9	4	1504, 13974, 43917, 312	0.2688	0.9609
NANOS3	3	10504, 14379, 6307	0.2011	0.9605
AAGAB	4	16343, 1465, 42527, 189	0.1931	0.9595
UBE2G2	3	6486, 794, 33669	0.3204	0.9591
BTN3A3	3	2402, 29211, 5042	0.2816	0.958
CD34	3	8698, 24202, 1537	0.3134	0.9575
TSHZ3	3	31275, 3529, 3027	0.265	0.9542
ANKRD33	3	1541, 14034, 18561	0.1726	0.9535
MEIS3	2	6552, 14434	0.2514	0.9526
PTGS1	2	180, 33182	0.1527	0.9503
ZNF776	4	2154, 4594, 22379, 14935	0.2062	0.9503
NUP107	3	26959, 7362, 1651	0.3074	0.9493
MCFD2	4	16448, 1991, 13757, 12099	0.2178	0.9489
PABPC1	4	21385, 7941, 15176, 832	0.2475	0.9478
POLR2J2	3	9758, 12595, 8764	0.1538	0.9465
HYLS1	3	25230, 1037, 9898	0.2708	0.9465
LUZP2	4	6842, 7997, 181, 42737	0.4036	0.9458
ABHD6	2	11469, 9241	0.1787	0.9454
NRK	4	7822, 12402, 12321, 9055	0.1075	0.9448
XKR9	3	5404, 13513, 12885	0.1779	0.944
PPARG	2	22813, 1244	0.1797	0.9436
ZNF420	2	587, 28013	0.1642	0.9434
SLC11A2	3	2029, 6171, 28266	0.3003	0.9428
PTTG1IP	2	19835, 2495	0.2104	0.9417
ST7	2	8530, 12337	0.1997	0.9374
HIPK4	3	12343, 18840, 2269	0.2749	0.9354
PLEKHA1	3	14288, 4674, 13314	0.1987	0.935
PON1	2	7314, 13701	0.2331	0.9347
OR51I2	4	14080, 1956, 12802, 15934	0.2023	0.9339
APOA4	3	206, 7096, 38816	0.3062	0.9333
CMC2	3	18133, 4357, 9749	0.3009	0.9309
OR52N5	3	6752, 2175, 26684	0.3054	0.9309
MGC50722	2	9262, 11652	0.183	0.9305
MAGEB16	4	26993, 4345, 10418, 3888	0.3593	0.9301
ACTR6	3	4341, 32465, 2287	0.3003	0.9298
HES3	2	321, 31300	0.1616	0.9294
KIAA0226L	2	12228, 8743	0.197	0.929
UCP1	2	31919, 278	0.1607	0.9289
THBD	2	23170, 1243	0.1839	0.928
ST8SIA4	3	17337, 5718, 8907	0.277	0.9252
ECI1	3	39278, 951, 3961	0.3475	0.924
PTPN3	2	33850, 177	0.1597	0.9239
TMEM100	4	7629, 1646, 12757, 22554	0.3426	0.9235
TXNL4B	3	43882, 1166, 1717	0.371	0.9228
ASCC3	3	1996, 8059, 24722	0.3187	0.9225
CYB561D1	2	15111, 6260	0.2684	0.9222
PCDHB7	2	16860, 4935	0.2769	0.9218
SELL	4	12168, 29682, 3073, 3355	0.2933	0.9211
EDNRB	3	1261, 6231, 32498	0.3291	0.9202
SPAG11B	3	15034, 9687, 7002	0.2191	0.9194
KDM3A	3	24047, 4996, 4381	0.2597	0.9189
TAL1	4	6427, 20769, 8233, 6338	0.2398	0.9182
FAM185A	4	11979, 3611, 4403, 25186	0.3183	0.918
PI3	4	12676, 22738, 1589, 7882	0.3524	0.9167
MDK	4	340, 15247, 3533, 37671	0.228	0.9165
KRT82	3	337, 11037, 30371	0.184	0.9163
COQ7	4	20131, 11117, 9556, 2638	0.282	0.9152
CTRL	3	14582, 8246, 8894	0.2067	0.9151
SERF2	2	19943, 2572	0.2199	0.9149
DEFB127	4	2328, 31897, 18527, 742	0.1444	0.9142
NUF2	2	13165, 8020	0.2199	0.9141
H2AFX	4	16174, 13985, 6914, 5852	0.2094	0.914
GDI2	2	5244, 16549	0.287	0.9134
POTEA	2	1691, 21561	0.1992	0.9118
OR56A1	2	24959, 1047	0.1836	0.9117
ETFB	3	4681, 43068, 254	0.3827	0.9108
TAAR9	3	9513, 8205, 14093	0.1935	0.9099
KRTAP5-5	3	9409, 14891, 7506	0.2151	0.9099
TRIM51	2	978, 25481	0.1826	0.9092
GAK	4	37798, 5923, 3522, 4402	0.3859	0.9085
SCGB1D4	3	4333, 15891, 12682	0.243	0.9067
NOS1AP	2	18321, 3907	0.2555	0.9064
RBMX	4	12231, 92, 39545, 7115	0.2594	0.9055
OR2A7	2	36028, 111	0.1633	0.9051
RPL22L1	2	17146, 4845	0.2795	0.9051
DCAF15	2	1376, 22997	0.1941	0.9027
CIB1	3	39995, 2170, 2092	0.3348	0.9022
HS1BP3	3	12866, 13098, 6331	0.167	0.9
MSMP	2	20590, 2227	0.2163	0.8977
AMOT	4	40849, 9350, 1553, 3216	0.4522	0.8957
GPD1L	2	7469, 13989	0.2402	0.8955
HIPK2	4	12873, 1870, 23619, 7232	0.3484	0.8954
CPNE3	2	1200, 24342	0.1919	0.895
TRPM1	2	17451, 4710	0.2791	0.8948
KIAA0930	3	20040, 10254, 2858	0.3383	0.8946
CTTNBP2NL	3	41386, 804, 3693	0.3764	0.8927
UBOX5	4	38965, 613, 426, 20596	0.1248	0.8919
TRIM32	4	28448, 1720, 8146, 9903	0.3384	0.8916
SLC4A9	2	28455, 661	0.1801	0.891
SUPT3H	3	1171, 36642, 5005	0.3535	0.8903
CAPSL	3	34757, 5124, 1518	0.3425	0.8898
TLR6	3	19862, 6874, 5393	0.2711	0.8895
OR4F6	2	15677, 6130	0.2827	0.8886
SPATA20	3	3614, 23717, 6313	0.2976	0.8882
PRSS45	2	3813, 18620	0.2587	0.8876
VWC2	3	10202, 9985, 11959	0.1376	0.8874
COL4A5	3	27447, 9624, 1071	0.3063	0.8871
CPSF6	3	2220, 25265, 7934	0.3323	0.8865
MESDC2	4	17999, 8428, 5266, 11697	0.2651	0.8864
VWF	3	6872, 28377, 2068	0.3307	0.8861
PRTG	3	19618, 11906, 2383	0.3136	0.8847
RAB31	3	4959, 30069, 2901	0.3107	0.8843
VHLL	3	30557, 5165, 2641	0.318	0.8834
TMEM208	3	30906, 6137, 1943	0.335	0.8831
COL4A1	3	11142, 1012, 24945	0.2473	0.8826
HCN1	3	22904, 5559, 4646	0.277	0.8817
WNK3	4	6672, 24020, 14372, 1581	0.2936	0.8815
SASS6	2	10842, 10565	0.1639	0.8806
IL27RA	2	17248, 4977	0.2901	0.8799
TAS2R5	3	34319, 5009, 1775	0.3426	0.8788
IFRD2	4	4471, 4399, 39367, 4641	0.3872	0.8786
ZUFSP	3	32004, 8184, 891	0.3535	0.8777
CREB3L1	3	3458, 6596, 24014	0.3078	0.8775
CRCT1	4	11730, 7779, 7915, 15791	0.1981	0.8771
BRIX1	2	14242, 7415	0.2465	0.877
ELMO3	2	21046, 2117	0.2197	0.8765
IFITM5	3	568, 7104, 36553	0.3711	0.8761
SHISA3	2	926, 26722	0.191	0.875
B2M	2	10314, 11191	0.1721	0.8747
COL27A1	2	5958, 16052	0.2919	0.8743
NRG2	2	31860, 366	0.1779	0.8738
SCARA5	3	6941, 2535, 26803	0.3291	0.8737
PBX2	3	5903, 10643, 16271	0.2537	0.8729
C6orf52	3	5128, 8971, 18696	0.3071	0.8727
FTSJ3	2	29239, 632	0.1849	0.8715
HSFX2	3	29059, 6876, 2024	0.34	0.8706
KRTAP9-6	4	16486, 19217, 942, 10688	0.1919	0.8704
PTPDC1	3	25487, 1954, 8670	0.3492	0.8701
PRR25	2	7788, 13940	0.239	0.8699
SOWAHB	3	8013, 5261, 19319	0.2949	0.8699
SERBP1	2	22559, 1604	0.2091	0.8693
LRRC42	4	1422, 100, 46760, 15745	0.3045	0.868
NIT1	4	34365, 2907, 12340, 2692	0.3239	0.8671
SLITRK3	3	9682, 2396, 21668	0.3511	0.8659
SH3BGRL3	4	5111, 20093, 2780, 17197	0.2129	0.8654
CORIN	4	5488, 9351, 20130, 8158	0.2662	0.8653
UTS2R	4	1998, 10558, 29927, 6867	0.3878	0.8652
XRCC1	2	3923, 18673	0.2682	0.8644
STAMBP	2	16676, 5556	0.3073	0.8644
CYP4B1	3	32657, 3829, 3224	0.3126	0.8636
CSDE1	3	15782, 19148, 1187	0.1294	0.8625
RPL39	2	788, 28025	0.1916	0.861
PDGFRB	2	6282, 15824	0.2863	0.8586
CDKN2A	2	18570, 4063	0.2736	0.8585
CRTC2	2	21436, 2020	0.2226	0.8581
TGOLN2	3	27149, 11393, 764	0.2305	0.8573
NOL6	2	26734, 975	0.1974	0.8569
AKAP6	3	8445, 9139, 15110	0.2213	0.856
BOLA2	2	261, 33705	0.1805	0.8558
CT47A6	2	14737, 7197	0.259	0.8554
SIGMAR1	3	10935, 4825, 17645	0.2926	0.8547
FAM127A	4	10323, 2935, 5698, 30180	0.4041	0.8545
MAFF	2	26097, 1067	0.2006	0.8539
SPAG11A	3	4453, 3918, 29214	0.3027	0.8534
SPATA25	2	21728, 1921	0.2217	0.8531
SCAF11	2	16642, 5684	0.3065	0.8528
GTF3C3	3	8875, 2711, 22457	0.3481	0.8524
ATG10	3	4469, 34070, 2419	0.3424	0.8522
REV3L	3	26626, 3703, 5664	0.3131	0.8514
JMY	4	10646, 1912, 23743, 10141	0.3176	0.851
KERA	3	17456, 11765, 4462	0.2871	0.8507
ZNF41	3	14447, 19417, 1636	0.1938	0.8502
NCAM2	3	9635, 11637, 11443	0.1298	0.85
KHNYN	3	3154, 35273, 3135	0.3244	0.8499
ZNF28	2	20766, 2412	0.2348	0.8498
LUC7L	2	15546, 6589	0.2794	0.8498
NFAM1	3	40580, 3380, 1341	0.3842	0.8498
OSBPL10	3	5088, 2670, 31730	0.3374	0.8486
CCDC23	4	4956, 12708, 5134, 21391	0.3395	0.8479
OR5L2	4	14580, 556, 23663, 10695	0.1874	0.8463
ITK	2	21733, 1950	0.2245	0.8463
COBLL1	2	7082, 14986	0.2653	0.8452
MC2R	2	29782, 643	0.193	0.8445
P4HA1	3	21876, 15790, 448	0.09389	0.8441
NKAIN1	2	325, 33037	0.1855	0.8438
ZNF440	4	32639, 9318, 5544, 2980	0.4132	0.8437
GRK5	3	8725, 327, 36894	0.2969	0.8422
AGBL2	3	22933, 3210, 7898	0.3381	0.8419
C1QBP	2	16170, 6175	0.2948	0.8398
ABCD4	2	19649, 3250	0.2592	0.8384
R3HDML	4	2292, 10527, 26306, 8574	0.3558	0.8358
IFIT2	4	10727, 37219, 7676, 536	0.4091	0.8352
C5orf30	3	34444, 5679, 1698	0.3693	0.8349
CCDC71L	4	26282, 4213, 11644, 4953	0.3886	0.8348
AGBL5	2	966, 27383	0.2037	0.8345
BAHCC1	2	7804, 14320	0.2485	0.8344
RPL5	3	7746, 23382, 3258	0.3404	0.8334
STK40	2	14280, 7854	0.2475	0.8329
GJC1	4	12211, 6043, 2367, 28763	0.3951	0.8327
ATP6V1G3	3	3800, 26757, 5756	0.3223	0.8319
GRM2	3	3029, 6594, 27199	0.3414	0.8309
MSL2	2	6296, 16126	0.2938	0.8303
CRISP2	2	34250, 260	0.1884	0.8286
NOVA2	3	10135, 16146, 7060	0.2501	0.827
NPTX2	3	6065, 1119, 36401	0.3878	0.827
PPP4R2	3	10124, 34011, 419	0.2596	0.8265
LAMTOR5	2	35531, 186	0.1874	0.8261
TSGA13	2	27225, 1018	0.2077	0.8256
USP24	2	23539, 1627	0.2227	0.8255
POC1A	3	25965, 8143, 2451	0.3612	0.8253
PANX1	4	3120, 21885, 7844, 12079	0.373	0.8253
CCL4L2	2	34622, 243	0.1891	0.8247
MAP4K5	3	4827, 25980, 5012	0.3008	0.8247
SLC24A5	3	13795, 11991, 7567	0.1854	0.8245
ZNF763	2	1590, 23719	0.2222	0.8244
SPRR2F	3	14789, 9390, 9046	0.2124	0.8238
KRTAP9-4	2	20003, 3101	0.26	0.8238
FAM131A	3	1594, 29745, 8213	0.3776	0.8227
TLL1	2	5429, 17279	0.3185	0.8219
RAB1B	4	6744, 11633, 7536, 18530	0.2818	0.8212
ZC3H10	3	19563, 7872, 5770	0.3091	0.8211
ODC1	3	8618, 2822, 23652	0.3601	0.821
ATP6V0A2	3	7291, 12198, 13965	0.19	0.8208
DBF4	4	20198, 3820, 28265, 564	0.1756	0.8203
UHRF1BP1	4	7703, 10035, 19928, 6350	0.2939	0.8202
ATPIF1	2	29550, 729	0.2027	0.8189
ZNF222	2	12155, 10080	0.1951	0.8179
BPY2C	4	9129, 39959, 999, 6269	0.482	0.8176
IZUMO1R	4	15164, 5546, 12959, 11327	0.18	0.8175
PPARD	4	21524, 8249, 6605, 7395	0.2785	0.8173
DYNC2H1	4	21591, 1130, 20785, 4126	0.1848	0.8172
SQSTM1	3	3412, 39626, 1832	0.3879	0.8168
MAST3	3	15470, 31684, 78	0.07982	0.8158
HIST1H1D	3	144, 18320, 22932	0.06116	0.8152
CARD6	2	2537, 20948	0.2487	0.8142
CCNJL	3	11679, 3083, 19705	0.3512	0.8136
SULT1C3	4	4723, 5535, 9849, 27855	0.3891	0.8133
RET	4	16633, 14130, 17053, 1062	0.1405	0.8131
LZTFL1	2	9066, 13272	0.2225	0.813
MAGEF1	2	2016, 21959	0.2364	0.8119
CCZ1B	3	1315, 12888, 21993	0.2375	0.8112
RGL1	2	7728, 14668	0.2573	0.811
TPM4	3	5330, 5600, 23406	0.3018	0.8101
WDR62	2	12719, 9602	0.2089	0.8096
RPL30	2	12369, 9947	0.2005	0.8095
ALDH8A1	3	11214, 4717, 18206	0.3087	0.8093
AVP	2	31433, 548	0.2012	0.8092
PGM2L1	2	8282, 14129	0.2437	0.8092
SLC39A8	4	15524, 22038, 6463, 2351	0.2909	0.8082
OR52J3	4	22768, 5251, 7988, 8802	0.3107	0.8052
H2AFV	3	6479, 2750, 29443	0.3621	0.8041
COL28A1	2	21311, 2387	0.2482	0.8037
PNMAL1	3	8248, 14853, 10524	0.2141	0.802
STRIP1	3	1100, 9729, 30041	0.3398	0.8017
CLEC16A	3	15639, 3899, 15334	0.236	0.8015
CLCN1	3	6633, 7671, 19160	0.3027	0.801
FGF3	3	13653, 24595, 766	0.1811	0.8009
USP11	3	18711, 779, 18609	0.1094	0.8005
SLC16A2	3	25876, 4876, 5329	0.3155	0.7997
RPL36A	4	12058, 2384, 836, 44966	0.4472	0.7989
LRRC3B	3	28544, 14924, 231	0.1105	0.7987
BMP7	3	9128, 639, 34581	0.3292	0.7982
UBN2	3	7562, 8257, 17870	0.2978	0.7977
KCTD16	3	33633, 446, 10653	0.2549	0.7975
CHTOP	3	202, 44206, 5771	0.4398	0.7968
C9orf131	3	5682, 2519, 32462	0.3718	0.7965
MAP3K10	3	4292, 9287, 20281	0.3569	0.7958
DIP2B	2	27787, 1041	0.2175	0.7955
CLIP3	2	18808, 4376	0.3007	0.7954
FEZF1	2	8175, 14391	0.2503	0.7952
NT5DC1	2	10495, 12003	0.1914	0.7936
SETD5	2	4857, 18282	0.3133	0.7924
ROBO1	2	23179, 1871	0.2388	0.7923
FAM3A	3	30387, 4123, 4575	0.3339	0.7921
HOXB2	2	10225, 12318	0.1992	0.792
TMSB15A	2	1456, 25132	0.2289	0.7917
LIN28A	3	5701, 42785, 382	0.4394	0.7909
C1QL1	2	18504, 4690	0.3099	0.7904
PMP22	2	2026, 22492	0.2435	0.7897
GOLGA6L9	2	2617, 21049	0.2585	0.7894
IFT27	3	5369, 11399, 17567	0.2903	0.7892
PIK3IP1	3	11287, 17234, 5732	0.2807	0.7888
BCAS3	4	4062, 30139, 5677, 10059	0.4236	0.7885
ALS2CR11	3	5402, 22194, 6253	0.3175	0.7868
OR4K14	4	16889, 14279, 10824, 4235	0.2311	0.7864
IL34	2	2130, 22065	0.2474	0.7858
ASB4	4	5822, 9926, 435, 43932	0.5301	0.785
ATOH8	2	16578, 6358	0.305	0.7844
YIPF6	3	11768, 8514, 13681	0.1824	0.7842
EQTN	3	14247, 9158, 10516	0.1975	0.784
TLR7	2	35171, 255	0.2017	0.784
MAGT1	2	994, 28366	0.2202	0.7829
KLF7	4	3356, 11154, 24003, 8294	0.3781	0.7828
OOSP2	3	11677, 25321, 1348	0.2926	0.7823
C7orf73	2	7873, 14841	0.2617	0.7816
MGMT	4	22166, 3983, 14169, 5744	0.3406	0.7799
SGOL2	2	15302, 7468	0.2732	0.7789
FRMD3	2	473, 32756	0.2086	0.7788
GPCPD1	4	2615, 526, 20215, 34281	0.1855	0.7786
GFPT2	4	5360, 9528, 8114, 21857	0.3294	0.7784
MERTK	3	25712, 9311, 2335	0.3934	0.7782
GPR63	2	1233, 26952	0.2276	0.778
RNF44	3	9175, 13027, 11905	0.1652	0.7761
LVRN	3	12090, 7809, 14270	0.1982	0.7758
SLC39A13	3	11715, 12303, 10088	0.1463	0.774
DEFB114	2	15039, 7764	0.2666	0.7734
VEGFC	3	8296, 39, 45142	0.3033	0.7728
BRPF3	4	4831, 11759, 11885, 17794	0.2586	0.7718
IL1B	3	490, 24712, 15522	0.1214	0.7714
LEMD3	3	1829, 19507, 15239	0.2052	0.7706
SCYL2	3	18873, 13675, 3064	0.3275	0.7691
PPP1R35	3	14361, 13617, 6560	0.2006	0.7687
MTOR	2	11693, 11086	0.184	0.7664
MAGEB5	2	12610, 10248	0.2062	0.7657
APOL5	3	1274, 8276, 33010	0.4153	0.7655
RPS6KA3	4	9807, 4029, 5430, 32216	0.4507	0.7641
OR6S1	2	10837, 11982	0.1909	0.764
PRR29	3	8073, 15215, 10989	0.2242	0.764
TAGLN3	2	22359, 2186	0.2558	0.7636
TNFRSF12A	2	14135, 8801	0.2438	0.7627
SCP2D1	3	5950, 2810, 31819	0.3849	0.762
DNAAF5	3	13698, 21719, 1406	0.2348	0.7619
KLHL24	2	27970, 1131	0.2303	0.7616
SNAPC2	2	204, 36485	0.2078	0.7602
RPL36AL	2	25449, 1563	0.2414	0.7598
TGIF1	2	5809, 17506	0.3278	0.7596
CDH10	2	30010, 841	0.2239	0.7589
CLEC2B	3	4214, 14172, 17077	0.2763	0.7586
PRSS2	2	29790, 879	0.2253	0.7578
WDR86	2	11579, 11282	0.1813	0.7568
PRPS2	4	2676, 17051, 6652, 20829	0.2969	0.7555
ANKRD34A	4	29135, 1520, 1266, 23831	0.1519	0.7554
IL31	2	45016, 4	0.2045	0.7551
BAZ2B	3	441, 7356, 40353	0.4076	0.7545
LCORL	3	5715, 18346, 10647	0.3126	0.7544
GLE1	2	13723, 9271	0.2337	0.7539
PPEF1	2	34130, 395	0.2146	0.7536
PNPT1	4	32172, 23817, 795, 1535	0.1556	0.7535
DPP10	4	3808, 16149, 20491, 6187	0.2976	0.7532
STRAP	2	27629, 1210	0.2349	0.7529
MANBAL	3	19997, 5599, 8674	0.3545	0.7517
FSCN1	2	9040, 14016	0.2409	0.751
TESPA1	3	35936, 8590, 747	0.3834	0.7509
CYB561D2	2	9646, 13378	0.2252	0.75
SCIMP	4	18791, 6483, 8191, 12609	0.29	0.7497
CYTH4	3	3519, 30700, 5706	0.3774	0.7476
ZFAND5	2	23214, 2096	0.2591	0.7467
ELP5	2	9000, 14116	0.2433	0.7463
BTBD3	3	2927, 27503, 7904	0.3953	0.7458
EBP	2	9622, 13436	0.2266	0.7457
KIAA1551	3	47710, 807, 1733	0.8065	0.7449
PNMT	4	3264, 4647, 7193, 41105	0.5266	0.7442
UGT2B4	2	13286, 9828	0.2229	0.7437
GEMIN6	2	22232, 2353	0.2668	0.7429
DHRS12	3	16071, 1938, 19093	0.1995	0.7426
E2F4	4	487, 3602, 14239, 43434	0.4043	0.7414
CFHR2	3	18146, 14380, 3485	0.3069	0.7403
EXOC1	2	2018, 23796	0.2593	0.7402
RNASET2	3	7264, 6424, 20469	0.3327	0.7388
TEX33	3	4059, 35870, 3200	0.3916	0.7379
STAC	2	9992, 13199	0.2208	0.7375
ECI2	4	8321, 2371, 12834, 26616	0.4435	0.7372
WFDC10A	4	6300, 15471, 4150, 20810	0.3244	0.7368
RHOA	2	11253, 11898	0.189	0.7344
HNRNPA1L2	3	15135, 549, 26145	0.1471	0.7334
TMEM106B	3	19336, 133, 23335	0.0686	0.7327
OTOS	3	15902, 10967, 7987	0.2433	0.7327
SLC30A5	2	31170, 750	0.2303	0.7321
GLB1	4	15661, 1569, 34664, 4183	0.3221	0.7305
TRIM16L	4	3576, 40152, 13637, 1360	0.4109	0.7303
ZNF180	4	8351, 94, 14245, 40498	0.2569	0.7295
ERVMER34-1	4	2958, 18433, 11591, 15138	0.2787	0.7295
CTNND1	4	12365, 2717, 18614, 14615	0.2844	0.7293
RASA4	3	7781, 710, 38211	0.4245	0.7292
SYT14	2	11563, 11673	0.1835	0.7284
CT47A12	2	7646, 15713	0.2835	0.7278
SGK1	3	11664, 5254, 18428	0.3149	0.7276
XIRP2	3	8050, 519, 39296	0.3984	0.7276
C2orf47	3	15274, 23632, 816	0.1623	0.7265
PLEKHG7	2	9386, 13929	0.2387	0.7261
GLRA1	3	3621, 8642, 24121	0.398	0.7257
MMADHC	3	3398, 3573, 36891	0.3947	0.7256
MED27	3	1735, 821, 47922	0.8198	0.7227
MADD	3	5036, 7303, 22981	0.3678	0.7217
PHF14	4	32510, 4606, 2162, 15163	0.3417	0.721
KCNC3	3	7434, 11311, 16329	0.2552	0.7205
MUC5AC	4	6915, 43913, 3526, 3454	0.5834	0.72
ANAPC10	4	23561, 8880, 8381, 6122	0.3455	0.7189
SMPD3	3	20880, 3750, 10669	0.3845	0.7186
SMARCAD1	3	22742, 14, 24098	0.04119	0.7185
NREP	3	22618, 2358, 11782	0.3769	0.7177
MYL2	3	21803, 13993, 1562	0.2509	0.7176
CNIH2	4	2682, 32257, 14213, 4722	0.3778	0.7168
TAS2R14	4	21777, 2188, 13864, 10447	0.3841	0.7167
CEP89	2	17639, 6100	0.3311	0.7163
NCR1	3	9608, 12577, 12946	0.1631	0.7153
BLVRA	3	1696, 7270, 34695	0.4384	0.7111
CX3CR1	2	12093, 11349	0.1937	0.7096
TRIP12	4	25809, 2867, 12954, 8287	0.4541	0.7078
SYK	4	9422, 9173, 36771, 1324	0.4645	0.7078
KRTAP21-3	4	25985, 2274, 15362, 7053	0.3648	0.7075
MLLT1	3	3286, 26696, 8283	0.412	0.707
KRTAP6-2	4	8258, 38805, 43, 17751	0.1618	0.7045
ARPC5	2	22256, 2573	0.2849	0.7044
KLHL36	3	16029, 5152, 14883	0.2469	0.7033
TMEM204	2	14398, 9180	0.2505	0.7028
LRRC39	2	16741, 7006	0.3089	0.7028
SOS2	3	7586, 16464, 11331	0.259	0.7018
C8orf86	3	7598, 2513, 31211	0.4274	0.7012
ANKRD37	2	28861, 1216	0.2526	0.6994
OR56B4	2	18292, 5653	0.3471	0.699
PUS1	3	2394, 39252, 4125	0.4413	0.699
ARG1	2	22538, 2529	0.2862	0.6974
FCAMR	4	466, 5921, 40422, 14402	0.4208	0.6971
SECISBP2	3	10122, 14837, 10472	0.2137	0.6965
GS1-259H13.2	3	413, 8051, 40946	0.4053	0.6963
SRPX2	2	10860, 12769	0.2101	0.6959
TARBP1	2	5711, 18250	0.346	0.6955
PSG6	4	14423, 2126, 36052, 4166	0.3913	0.6954
NAALADL2	3	7430, 12357, 15815	0.2409	0.6948
OR52D1	3	30691, 883, 12091	0.2841	0.6948
GIT2	3	10029, 18715, 6692	0.323	0.6941
ENTPD1	3	13532, 4931, 17759	0.2959	0.6939
SMYD3	3	4211, 29557, 6059	0.3954	0.6938
PPM1K	4	3038, 2762, 9205, 44137	0.5854	0.6935
AK3	3	6780, 12081, 16891	0.2711	0.6926
ZFP14	3	15291, 26657, 610	0.1617	0.6925
MRPL2	2	672, 32684	0.2414	0.692
ADORA2B	2	21350, 3047	0.3012	0.6912
ZNF23	4	11575, 2310, 8325, 31336	0.4748	0.6911
ZDHHC11	2	4961, 19042	0.3484	0.6905
TRPV1	2	9177, 14542	0.2541	0.69
POLR3GL	3	4688, 7951, 23738	0.397	0.6892
ELF2	3	43746, 264, 7133	0.4369	0.6875
ARHGEF6	4	18246, 52, 10377, 34325	0.1101	0.6863
PCDHA1	3	2359, 26775, 10319	0.4457	0.6863
RRAGB	4	9919, 32271, 636, 14386	0.306	0.6855
OTOR	3	13192, 24058, 1697	0.2998	0.6852
LAMTOR4	2	23614, 2364	0.2863	0.6848
KRTAP2-2	4	14940, 2921, 34980, 3384	0.3549	0.6844
GALNT14	3	31352, 4523, 5137	0.3924	0.6839
METTL9	2	1189, 29365	0.2572	0.6837
KRTAP27-1	2	13298, 10514	0.2232	0.683
FAM213A	3	396, 6318, 43945	0.4893	0.6826
CHMP2B	2	16645, 7247	0.3066	0.6822
NFIX	2	14128, 9705	0.2436	0.6812
RPL41	3	8232, 2560, 30468	0.4396	0.6809
STRN4	2	17007, 6966	0.3155	0.6808
H2AFY	3	20620, 9753, 5037	0.3771	0.6808
HIST1H2BJ	2	1821, 26106	0.2744	0.6797
GPLD1	3	6930, 1384, 37535	0.4665	0.679
ZNF749	3	1685, 50364, 81	0.9135	0.6789
BMP2K	4	31359, 5854, 6326, 8652	0.4416	0.6786
DEFA5	4	3597, 3234, 14252, 34834	0.3842	0.6783
EXOC5	2	9915, 13964	0.2395	0.6779
AVIL	3	4013, 38177, 3056	0.4363	0.676
TMCO3	2	21926, 2793	0.3002	0.6751
ZNF248	3	2956, 7972, 29804	0.4356	0.6746
TAS2R43	4	39379, 10043, 14445, 110	0.2269	0.674
PAGR1	3	10854, 25892, 2405	0.4315	0.6735
FBXW7	3	20449, 9797, 5275	0.3722	0.6727
PARG	3	13497, 5797, 17068	0.2761	0.6724
RAD50	2	23771, 2395	0.2915	0.6717
MRI1	3	848, 30710, 12601	0.2746	0.671
ARHGEF12	3	9204, 2334, 29702	0.4512	0.6708
TRIM68	2	3251, 21234	0.313	0.6706
IMMP2L	2	24575, 2212	0.2877	0.6697
TMEM136	3	17295, 10784, 7816	0.2825	0.6691
FBXL4	2	2554, 23281	0.2965	0.6686
ABHD3	3	11602, 15552, 8822	0.2335	0.667
INPP5E	2	30386, 1087	0.2605	0.6669
SLC25A47	2	3261, 21267	0.3146	0.6666
MBTD1	3	17873, 20741, 931	0.153	0.666
LPCAT2	2	14626, 9367	0.2562	0.6651
WDFY1	3	9142, 40519, 359	0.3729	0.6647
HCFC2	4	11389, 2937, 35182, 6089	0.5366	0.6643
ZNF362	4	11986, 14859, 16913, 5030	0.2318	0.6639
DDRGK1	2	36856, 302	0.2419	0.6632
CCDC134	3	5344, 2052, 38652	0.4674	0.663
UBE2K	3	852, 5472, 43025	0.5026	0.6625
LSP1	3	7582, 22982, 5555	0.3935	0.6621
SHROOM4	2	16975, 7171	0.3147	0.6611
WDR44	2	15699, 8387	0.2832	0.6602
GPR139	4	7826, 7009, 37868, 3491	0.5091	0.66
TTPA	3	11921, 9891, 14319	0.1995	0.6591
TEAD3	3	4069, 22145, 10008	0.4197	0.6584
CKMT1A	2	25428, 2078	0.2882	0.6581
CTPS2	4	17165, 22241, 1402, 9991	0.3382	0.6574
ALOX12B	4	27974, 17042, 778, 9473	0.2905	0.6565
GJA1	4	17520, 3504, 5498, 23159	0.3229	0.6564
CTAGE9	2	14684, 9410	0.2577	0.6561
SLFN13	4	11926, 28785, 3737, 7624	0.4861	0.6556
SCMH1	2	19679, 4644	0.3525	0.655
ALG11	2	15354, 8774	0.2745	0.6542
ANKRD39	3	8238, 29385, 3094	0.4453	0.6542
FRMPD1	3	22233, 26327, 18	0.05047	0.6536
HTR1D	2	29900, 1226	0.2684	0.6536
HAS2	3	10673, 1066, 33293	0.3695	0.6524
ZNF177	4	6592, 30555, 10838, 4724	0.4898	0.6524
DACT3	3	11301, 17826, 7110	0.2978	0.6518
ZNF726	2	18534, 5840	0.3531	0.6504
C16orf95	3	41127, 6938, 808	0.4996	0.6502
PRKCI	4	40, 11931, 2737, 50323	0.9409	0.6498
HTR1E	3	9041, 6360, 20290	0.3679	0.6495
MS4A3	3	13492, 5752, 17526	0.2891	0.6475
SFN	2	7537, 16760	0.3094	0.6472
GLTSCR1L	3	23893, 6721, 6244	0.3835	0.6471
BTD	3	9176, 140, 43808	0.3579	0.647
TAS2R46	3	21076, 13078, 2978	0.3901	0.6464
OR2D2	3	6183, 5419, 27537	0.3987	0.6449
RSC1A1	3	40069, 1400, 6011	0.4923	0.6443
STK4	4	5864, 11999, 4028, 32343	0.5163	0.6441
NCAPD3	2	8655, 15621	0.2812	0.6437
SPRR3	3	16011, 13563, 7023	0.2464	0.6436
EPHB1	4	14726, 13460, 14053, 6655	0.1677	0.6422
KIF1BP	2	27364, 1754	0.2858	0.6415
ACAD11	3	9249, 14659, 12525	0.2088	0.6414
PILRA	4	5949, 13340, 15137, 14616	0.1792	0.6408
C2orf48	3	3066, 31108, 7664	0.4524	0.6408
SCGB1D1	3	1596, 27448, 12478	0.339	0.6403
NDUFA2	2	30894, 1099	0.27	0.6396
CNOT7	2	2289, 25049	0.2999	0.6393
SDCCAG3	3	35174, 3096, 5762	0.4546	0.6392
APOC4	4	44607, 10664, 10443, 114	0.3727	0.6388
SPP1	4	6179, 25095, 20384, 1126	0.3012	0.6383
VASP	4	2475, 21263, 36859, 671	0.2474	0.6375
RRAS2	3	12829, 30258, 1025	0.2931	0.6374
C18orf65	3	16505, 21202, 1389	0.2024	0.6368
CADM2	3	6868, 29755, 4121	0.4329	0.6368
UBE2D3	2	36572, 376	0.2532	0.6358
EPS8L1	2	14199, 10176	0.2454	0.6355
LAMP5	4	21507, 3299, 6038, 18514	0.3334	0.6351
ASIP	3	27907, 13271, 1272	0.2949	0.634
CRBN	4	37055, 14403, 13306, 80	0.143	0.6336
MAP1LC3C	2	417, 36285	0.2558	0.6312
VPS26A	4	6425, 11, 38131, 23811	0.1429	0.6308
LENG9	3	2059, 26315, 12174	0.3821	0.6308
MTHFD1	4	2357, 4335, 9955, 43548	0.6126	0.6308
ASL	2	27100, 1893	0.2934	0.6295
CHMP4B	2	26257, 2053	0.2974	0.6295
PRDM11	2	23421, 2733	0.3144	0.6286
CHRNB2	3	8754, 9879, 17913	0.3003	0.6273
CELF2	4	39266, 8666, 1405, 10030	0.545	0.6272
MAD2L2	2	33468, 745	0.2656	0.6268
HOXA9	4	4367, 24798, 5778, 15952	0.3675	0.6253
ATP1A2	4	37955, 6148, 3981, 8825	0.55	0.6253
AZI2	3	1228, 34222, 10177	0.4138	0.6244
SSBP2	3	10940, 23530, 3429	0.4572	0.6227
CGREF1	3	1611, 5932, 40082	0.5017	0.6226
TICRR	2	1143, 31019	0.2773	0.6221
PRKRIP1	2	1074, 31368	0.2757	0.6218
RGL2	3	12368, 828, 32809	0.3053	0.6207
STRA6	2	3833, 20946	0.3445	0.6196
SDAD1	2	24768, 2460	0.3109	0.6194
TONSL	3	47498, 155, 5807	0.5254	0.6178
DDIT3	4	5061, 31309, 25333, 224	0.2456	0.6174
SLC25A38	2	12560, 12019	0.205	0.6172
TRAF4	4	12080, 11228, 15578, 10209	0.1918	0.6166
GDAP1L1	4	13254, 7496, 23094, 5526	0.4249	0.6163
NEDD1	2	2861, 23189	0.3219	0.6161
HNRNPA3	3	1813, 5697, 40021	0.5022	0.6157
F8A3	2	16081, 8519	0.2926	0.6156
OR10C1	3	17215, 8712, 10857	0.2802	0.6151
MRPL15	4	4081, 23340, 7475, 15123	0.4325	0.6149
SEC11A	4	7055, 21083, 24395, 831	0.3155	0.6146
BTG2	4	18177, 6929, 13319, 10788	0.2706	0.6144
SORT1	3	18833, 11493, 6480	0.3263	0.6141
OR5P3	2	6040, 18666	0.3562	0.6124
RASIP1	3	19909, 2654, 15726	0.2903	0.6119
REG1B	4	24080, 4849, 6593, 14839	0.4277	0.6117
ZSWIM4	4	19091, 14639, 7916, 7301	0.2994	0.6115
OR1E1	3	5552, 18171, 13616	0.3076	0.6113
WWP2	2	24257, 2624	0.3177	0.6113
FOXJ2	2	2865, 23322	0.3241	0.6103
PPP4R1	3	6733, 28878, 4897	0.4336	0.6099
TAF2	2	860, 32972	0.2746	0.6097
SLC25A52	3	20569, 5689, 10223	0.3757	0.609
MRPL38	3	48381, 704, 2546	0.8544	0.6079
HOXB6	3	20062, 6086, 10429	0.3614	0.6074
MSMB	3	10013, 46, 45837	0.333	0.6071
PLA2G2D	2	10722, 13967	0.2396	0.6065
FAM162A	3	19354, 5346, 12371	0.3412	0.606
AMD1	3	37736, 5333, 2851	0.4826	0.6055
ORC2	4	18325, 13886, 11210, 6133	0.2754	0.6054
ZNF587	4	14232, 2799, 17294, 16973	0.2433	0.6051
ZIM2	3	38841, 2483, 5337	0.4929	0.6046
SLC22A5	2	16754, 8003	0.3093	0.6042
KAT7	2	2111, 26612	0.3077	0.6037
ZNF800	3	15908, 10781, 10369	0.2435	0.6029
HBS1L	4	39586, 17191, 711, 4945	0.3955	0.6018
METTL21B	2	30106, 1385	0.2905	0.6016
DCP2	3	61, 6887, 48093	0.4704	0.601
KRT12	3	18091, 540, 24564	0.1451	0.5999
FLG2	2	8945, 15859	0.2872	0.599
CCDC14	2	2211, 26336	0.3118	0.5989
FAM156B	2	25093, 2524	0.32	0.5975
ACOT12	3	7173, 633, 42996	0.5102	0.5973
WDR76	2	1514, 29478	0.2953	0.597
ZNF607	3	3760, 17014, 17630	0.2921	0.5968
IL25	4	19184, 22901, 461, 12218	0.1691	0.5967
TOE1	2	5634, 19192	0.3691	0.5962
SPHK1	2	10017, 14777	0.2601	0.5961
TWISTNB	2	21848, 3349	0.341	0.5955
EIF3E	3	17730, 15193, 4980	0.2951	0.5946
DUSP9	3	43240, 12998, 42	0.2293	0.5942
STK19	3	12706, 27604, 1834	0.3667	0.5926
RSAD1	3	20629, 13854, 3343	0.3773	0.5918
TEKT4	3	7509, 3452, 31669	0.4737	0.5916
MAD2L1BP	4	30668, 1039, 2650, 26607	0.2408	0.5911
C10orf2	2	40170, 169	0.264	0.5907
CYB5R4	2	22433, 3223	0.3397	0.5903
TIMM23B	3	26166, 5533, 7400	0.4349	0.5895
SLC38A8	3	13331, 11665, 12379	0.1731	0.5881
GJD3	4	9121, 6794, 7411, 29672	0.4612	0.5877
EPHX3	4	24567, 6109, 7830, 12053	0.4692	0.5876
LYPD4	3	16507, 19881, 2479	0.2798	0.587
DDX26B	3	9873, 19836, 7069	0.355	0.5868
DUSP14	3	28733, 17967, 279	0.1313	0.5864
NAV1	4	4544, 32471, 7682, 10306	0.5185	0.5861
SLC12A4	3	7819, 40923, 868	0.5041	0.5859
SPON1	3	1841, 30321, 11381	0.4184	0.5858
ACOT2	4	19996, 8584, 11365, 9084	0.328	0.5851
GLT1D1	3	6383, 6826, 25470	0.4178	0.585
STC2	3	25295, 10032, 3934	0.4773	0.585
MLEC	3	9535, 11799, 16047	0.2473	0.5847
SMIM22	2	29254, 1640	0.3029	0.5844
ACYP1	2	3265, 22447	0.3428	0.5844
PRSS12	4	40324, 1310, 6123, 13527	0.5331	0.5833
ZC3HC1	4	4264, 16008, 433, 44807	0.4679	0.5826
CRYBA2	2	22245, 3339	0.3452	0.5825
ODF2	4	42375, 11229, 6688, 1342	0.6144	0.5812
ZFP64	4	209, 4720, 38009, 21164	0.2935	0.5804
ARL6IP5	4	14025, 13292, 14378, 8398	0.1579	0.5803
ZBTB49	2	3192, 22798	0.3425	0.58
PTX3	3	4070, 18078, 16337	0.305	0.5794
CDON	3	27663, 4250, 8587	0.4709	0.578
H3F3A	2	1477, 30111	0.3012	0.5777
LOC200726	2	39350, 236	0.2702	0.5776
ST6GALNAC6	3	6381, 7306, 24542	0.425	0.5775
TRIM45	2	24179, 2872	0.3361	0.576
SPINK8	4	6748, 35720, 2526, 13176	0.5412	0.5748
C1orf167	4	8505, 35097, 4546, 8237	0.5137	0.5739
TPPP3	2	13627, 11422	0.2314	0.5733
PAM16	3	12259, 20976, 4364	0.3872	0.5728
NEK7	2	15558, 9508	0.2797	0.5721
PCDHB15	3	6723, 6390, 26275	0.4256	0.5715
TCEB3B	3	29956, 4570, 7187	0.4641	0.5714
ZNF816	4	7108, 12384, 10302, 19799	0.3217	0.5713
ANO5	4	538, 4301, 26556, 30481	0.27	0.5681
POLE4	3	47537, 9855, 15	0.3563	0.5678
RFX6	3	39385, 7384, 1450	0.5297	0.5671
CT45A2	2	24411, 2850	0.3388	0.567
CUL4A	2	1625, 29751	0.3089	0.5662
C9orf41	3	8095, 24805, 5773	0.4489	0.5657
COX11	2	6976, 18187	0.3444	0.5654
DAB2IP	3	31632, 1618, 11570	0.4097	0.5653
HSD3B2	4	34420, 1276, 1990, 24667	0.2507	0.5652
LOC100287036	4	4224, 8247, 13439, 27151	0.5307	0.5648
OR11L1	4	16932, 6695, 13746, 13291	0.2324	0.5644
TIGD5	2	16225, 8970	0.2963	0.5637
HECTD4	3	1932, 41389, 5491	0.5344	0.5613
PPFIA2	2	7206, 17978	0.3394	0.5612
GYS1	4	1460, 30078, 6236, 19068	0.3691	0.5609
EHBP1	4	20963, 559, 1447, 43769	0.3222	0.5596
OR10Z1	3	22534, 13095, 3134	0.4303	0.5595
RPS12	3	6736, 8220, 22125	0.4191	0.5594
ZPBP2	2	26018, 2518	0.3333	0.5593
PYCRL	3	9587, 10103, 17970	0.302	0.559
DYNC1H1	2	15412, 9783	0.276	0.5584
CNEP1R1	2	14144, 11100	0.244	0.5583
NR2C2AP	2	1830, 28985	0.3171	0.5575
STRADB	3	19238, 11101, 7125	0.338	0.5563
PITHD1	2	17469, 7795	0.3269	0.556
STMN4	3	20705, 12375, 4668	0.3795	0.556
SUMF2	2	3059, 23923	0.3479	0.5557
SSTR4	4	440, 3956, 45220, 16555	0.4743	0.5557
ACADVL	2	3005, 24199	0.3467	0.5553
WDYHV1	3	35779, 8659, 1971	0.5254	0.5538
TACC1	2	15156, 10131	0.2695	0.5534
VPS37A	2	34605, 800	0.2932	0.5531
MAST4	3	22416, 17952, 1036	0.1958	0.5511
IMPG2	3	12750, 24806, 2823	0.4369	0.551
LOC100130880	4	18607, 121, 34710, 11089	0.1657	0.5504
KMT2D	4	29233, 592, 2794, 32678	0.2513	0.5503
CACNB3	3	30012, 2523, 10744	0.4949	0.5503
PSMA8	4	8198, 22406, 3103, 17808	0.4036	0.5497
DEFB123	3	14266, 17858, 6188	0.2987	0.5492
KCTD3	4	5777, 8352, 3710, 42481	0.6298	0.549
GID4	3	20085, 356, 23072	0.1274	0.5488
TMPRSS7	2	13279, 12146	0.2227	0.5474
TRMT6	2	21184, 4229	0.3796	0.5472
PAX7	2	10581, 14763	0.2597	0.5464
GSC2	4	9640, 8364, 17553, 15122	0.2513	0.5463
ORM1	3	16076, 17482, 5166	0.2879	0.5463
PCGF6	3	33012, 16339, 300	0.1752	0.5461
FAM71D	3	25637, 326, 19395	0.1306	0.5449
ATP1B2	4	6556, 4662, 12816, 31891	0.5542	0.5449
PRLHR	4	13793, 717, 11717, 35270	0.3585	0.5428
PDPN	2	25161, 2815	0.3467	0.5421
SAP30L	4	8955, 25427, 2136, 17665	0.444	0.5418
CACNA2D4	3	963, 16142, 27322	0.2214	0.5407
DAPK3	2	12761, 12751	0.2099	0.5405
FAM156A	2	19325, 5989	0.3723	0.5398
BAIAP3	3	14586, 17889, 6028	0.2997	0.5395
MEF2D	3	13652, 14467, 10090	0.2036	0.5394
SFTPC	4	1837, 25955, 168, 43223	0.2766	0.5391
TUBA1C	2	35790, 670	0.2951	0.5388
CRYBB2	3	16062, 8038, 14194	0.2478	0.5382
KRT79	3	18261, 10822, 8905	0.3102	0.5379
LLGL2	2	3130, 24115	0.3564	0.5366
SPON2	3	6843, 20507, 10095	0.3739	0.5358
PCED1A	3	28063, 6354, 6557	0.4476	0.5347
AMIGO3	3	14982, 8189, 15134	0.222	0.5345
ANO7	2	30950, 1493	0.3171	0.5343
AIF1L	3	3499, 40592, 4042	0.5144	0.5343
SPRR1A	4	17755, 18697, 11951, 3619	0.287	0.534
IGDCC4	4	8319, 1753, 17233, 29795	0.4486	0.5335
WFDC8	3	2065, 11444, 30936	0.4532	0.5333
PYGO2	3	31746, 7792, 3902	0.5014	0.5331
OGT	2	2833, 25322	0.3505	0.533
C1orf101	2	2847, 25279	0.3508	0.533
XAGE1B	2	2886, 25150	0.3521	0.532
NPIPA7	3	11586, 10568, 16135	0.2498	0.5301
ORAI3	3	28526, 15608, 1010	0.2424	0.5299
CNTN5	2	15750, 9802	0.2844	0.5297
CDC34	3	35125, 6063, 4048	0.5001	0.5297
KLHDC1	4	7669, 9961, 9837, 23439	0.429	0.5293
PSMB9	3	46733, 2319, 2184	0.824	0.5279
ELOVL1	3	21, 42923, 15153	0.1876	0.5275
BTF3	3	12520, 30677, 1732	0.3986	0.5275
HIF1A	3	7990, 45668, 262	0.4875	0.5275
TEX30	3	4185, 11362, 23761	0.4635	0.5271
ADD1	4	6052, 17166, 12531, 15860	0.2395	0.5267
CUL5	3	4677, 43833, 1808	0.5636	0.5266
C21orf62	3	29294, 1082, 15006	0.2689	0.5264
PROX2	2	24102, 3191	0.3615	0.5264
DHX40	2	477, 37612	0.2949	0.5262
RHCG	3	12323, 23466, 3716	0.4555	0.526
PRRC2B	4	28299, 3217, 15024, 8517	0.5121	0.5254
NAV2	3	20, 45833, 12523	0.2804	0.5252
MCEMP1	3	5693, 8807, 25032	0.4786	0.5244
OR5B17	3	19765, 23391, 478	0.1462	0.5243
DDIT4	4	4480, 3347, 25102, 20459	0.3387	0.524
TAS2R50	4	4554, 27387, 5955, 16498	0.4268	0.524
SFTPA2	3	2110, 34176, 9725	0.5245	0.524
MCTP2	2	26139, 2687	0.3502	0.5237
EVA1A	3	12419, 11755, 14314	0.1994	0.5232
GZF1	2	3595, 22776	0.3728	0.5226
SLTM	3	3496, 26437, 11193	0.5199	0.5226
PTPRN	3	6616, 918, 43934	0.5742	0.5225
ICAM1	3	3146, 49281, 430	0.8926	0.5199
CSE1L	2	31116, 1539	0.3238	0.519
LRP12	2	20045, 5432	0.3899	0.5189
NKIRAS2	2	606, 36753	0.3016	0.5167
PROL1	4	39623, 8002, 2748, 10104	0.6132	0.5167
MLLT3	2	27744, 2340	0.3447	0.5151
TTC30B	4	23494, 23503, 2551, 4547	0.3347	0.5147
GSAP	4	46876, 1728, 7101, 7050	0.894	0.5147
IGFBP6	2	15712, 10033	0.2835	0.5146
TP53TG3	2	1453, 31554	0.3236	0.5135
DENND2D	3	31203, 6283, 5651	0.4753	0.5126
SERPINA10	3	418, 11494, 40458	0.3678	0.5118
F2RL2	2	24295, 3235	0.3681	0.5113
SLC28A1	4	9057, 6828, 39376, 4446	0.6094	0.5111
KCNV2	3	21464, 27419, 87	0.09447	0.5108
BRF2	3	4889, 11958, 21579	0.4041	0.5108
MOV10L1	2	11507, 14273	0.2473	0.5105
OSTM1	4	19511, 12898, 36, 35248	0.09751	0.5104
CCKBR	4	7553, 1368, 22459, 22249	0.3851	0.5099
AK7	2	6155, 19434	0.375	0.5093
TFAP2A	3	8939, 11265, 18262	0.3103	0.5092
AGPAT4	4	10720, 5222, 9889, 29025	0.5071	0.5087
EIF2B1	4	12940, 47558, 1507, 2710	0.8969	0.508
MYB	4	43668, 7851, 4799, 4960	0.8065	0.5075
MYH13	4	4184, 9058, 11225, 32358	0.5542	0.5074
HAGHL	3	30742, 7052, 5195	0.4903	0.507
ZNF593	3	12447, 28548, 2418	0.4465	0.5069
OSR1	2	18233, 7501	0.3456	0.5063
KCNK5	3	4268, 7912, 31449	0.5114	0.5059
EPC2	3	15926, 19515, 3948	0.3457	0.505
NEO1	3	2337, 28470, 12746	0.4328	0.5048
SIVA1	2	28978, 2093	0.3425	0.5046
ATAD3C	2	1415, 31997	0.3261	0.5043
CLN3	3	48243, 1161, 2726	0.8729	0.5043
ZNF329	2	842, 35282	0.312	0.5041
ATF7IP2	3	7335, 12832, 18519	0.3175	0.5041
PKIG	3	5529, 2163, 41965	0.5619	0.5038
SMIM13	4	5479, 49003, 1798, 6074	0.9556	0.5033
DYNLT3	4	10350, 13452, 17855, 10027	0.2605	0.5022
DUSP1	2	3577, 23450	0.3799	0.5017
FGD1	4	3571, 16510, 26222, 8109	0.4778	0.5017
MOB2	2	13942, 12007	0.239	0.5013
SPRR2A	2	13218, 12770	0.2212	0.5007
WDR43	2	2064, 29218	0.3434	0.5001
ZNF354C	3	12564, 1333, 33304	0.3898	0.4999
PPAP2C	3	12620, 23023, 3960	0.4437	0.4977
ITPKB	3	4963, 32473, 6710	0.5014	0.4974
NXPE2	3	5041, 14888, 19215	0.3374	0.4971
PLCB1	2	26705, 2691	0.3598	0.4971
FOXB1	4	14092, 27137, 13131, 2004	0.4327	0.4971
ZNF423	2	8545, 17353	0.3241	0.4968
ELOF1	2	3148, 25081	0.3713	0.4964
GDI1	3	20882, 16964, 2388	0.3061	0.4956
SPAG7	2	15529, 10427	0.279	0.494
ALCAM	3	28914, 11390, 2987	0.5183	0.4933
PCDHB16	2	1378, 32440	0.3296	0.4921
FAM58A	2	19729, 5980	0.3822	0.4921
PIF1	3	2262, 29728, 12434	0.4466	0.4915
ERP27	3	41713, 4573, 3040	0.552	0.491
RXRA	3	21878, 11268, 5300	0.4123	0.4908
HSPE1-MOB4	4	12813, 5590, 35572, 4937	0.5772	0.4902
DEFB135	2	1265, 33102	0.3278	0.4893
CAPN15	3	4617, 21153, 13184	0.3922	0.4892
ERG	4	5145, 1412, 22342, 29216	0.3532	0.4888
CERS6	2	4163, 21858	0.3991	0.4884
CCL3	2	14630, 11405	0.2563	0.4876
CDS1	3	6091, 32502, 5633	0.491	0.4876
PARPBP	3	791, 31762, 15402	0.2571	0.4869
NDUFV1	2	32903, 1311	0.3299	0.4866
PKNOX1	2	11938, 14191	0.2453	0.486
SSNA1	2	26377, 2871	0.3684	0.486
AGPAT6	3	26212, 15232, 1849	0.3209	0.4856
USP20	3	726, 20707, 20834	0.1758	0.4854
PEAK1	2	5858, 19922	0.3869	0.4854
HLA-DRB5	3	4979, 11325, 22985	0.4426	0.4849
PSMD2	3	8123, 33184, 3701	0.534	0.4849
CDC26	2	26502, 2846	0.3683	0.4846
IL9	2	760, 36134	0.3173	0.4843
CEBPE	3	14997, 15304, 8882	0.2267	0.4839
CHEK2	2	5738, 20074	0.3906	0.4828
PAGE1	4	5232, 19372, 7236, 19888	0.3245	0.4813
PYCR2	3	5353, 6638, 32052	0.5021	0.481
PRKACB	2	15998, 10161	0.2906	0.4809
MAPRE3	2	4879, 21028	0.414	0.4808
NXN	3	3392, 23133, 13772	0.4466	0.4797
C1orf115	3	9356, 28496, 4585	0.5245	0.4797
MMP1	3	23278, 12074, 4497	0.4504	0.4795
PSG5	3	18055, 14226, 7017	0.3043	0.4793
TAT	3	11353, 10713, 17058	0.2758	0.4791
ALOX5AP	4	5918, 9250, 14503, 22062	0.3932	0.4788
TMEM234	2	930, 35336	0.3237	0.4782
AKAP13	3	5872, 39065, 3220	0.5505	0.4779
RASSF9	4	19589, 17092, 2106, 15537	0.3018	0.4771
DPYD	2	34344, 1088	0.3284	0.476
HAND1	3	39019, 11510, 728	0.4077	0.4757
DNPEP	2	252, 40762	0.3082	0.4747
UBE3D	3	30289, 2962, 11051	0.5373	0.4745
PANO1	4	228, 42911, 23073, 3067	0.3442	0.474
RAB11FIP1	3	4484, 40872, 3637	0.5472	0.4738
CHI3L2	3	2972, 43887, 3654	0.5673	0.4738
GDPD2	4	5201, 19805, 2097, 31874	0.3982	0.4737
BNIP3L	4	4037, 6852, 27093, 17364	0.4608	0.4737
OXNAD1	4	12980, 544, 37331, 13739	0.3443	0.4736
PDAP1	3	5191, 23594, 10973	0.459	0.4735
FGFBP2	3	10475, 36623, 1526	0.4929	0.4729
CCDC144A	4	3280, 20237, 31835, 3292	0.3496	0.4726
ZNF571	2	14068, 12219	0.2421	0.4722
ST6GALNAC3	3	13674, 21081, 4526	0.3902	0.472
DMRTA1	3	1530, 2914, 47716	0.864	0.4703
CIT	4	7954, 7334, 14363, 21991	0.3909	0.4701
FOXR2	4	1237, 12291, 17946, 25867	0.3238	0.4691
TPSAB1	4	9847, 8520, 8555, 27331	0.4896	0.4691
TMEM30B	3	2445, 36657, 8542	0.5646	0.4689
ZNF717	4	23564, 1197, 4102, 32967	0.3424	0.4688
CAMKK1	4	6384, 16317, 8513, 20659	0.349	0.4682
FA2H	4	10274, 1034, 23328, 20956	0.3354	0.4669
TAOK1	3	17402, 13181, 8886	0.2855	0.4661
PVR	3	29914, 10883, 3247	0.5528	0.466
SKOR2	4	17350, 41311, 64, 11647	0.2104	0.4653
MRPS17	3	32857, 1033, 14368	0.3217	0.4649
PPFIBP2	2	3460, 24639	0.3905	0.4648
OR11G2	4	13, 19032, 36233, 15426	0.06423	0.4638
SAXO1	3	27128, 3881, 11288	0.5469	0.4637
LRRC59	3	12598, 15312, 11615	0.2269	0.463
TMPPE	3	45415, 3712, 2251	0.7917	0.4629
UXS1	3	1013, 31043, 15410	0.281	0.4627
RSRC1	3	18850, 13811, 6775	0.3268	0.462
DIDO1	4	29519, 17525, 4248, 5754	0.4492	0.4618
C9orf16	4	2961, 28146, 37001, 545	0.3058	0.4614
C9orf129	4	25200, 5072, 31795, 827	0.3485	0.461
MVP	2	23032, 4005	0.4054	0.4609
CCDC116	3	31266, 12068, 2312	0.4774	0.4609
TMCO5A	3	39674, 2883, 6258	0.5664	0.4609
RHBG	2	11622, 14751	0.2594	0.4607
NUP62	4	19024, 4741, 31049, 3379	0.4089	0.4602
OR1L4	2	22323, 4225	0.4112	0.4596
XAGE2	2	18745, 7419	0.3581	0.4591
EPT1	3	17541, 1828, 22238	0.283	0.4588
UTS2B	3	42048, 348, 11757	0.3855	0.4571
DNAJC30	4	2050, 18487, 39195, 3777	0.4443	0.4559
SERPINH1	3	5306, 36101, 5245	0.5189	0.455
SLC25A53	4	12643, 10153, 21285, 7831	0.3685	0.4546
ARHGDIB	2	15504, 10888	0.2783	0.4543
ALPL	2	7880, 18405	0.3499	0.4534
CSF2RA	4	4855, 3244, 20998, 26523	0.3823	0.4534
RAI2	4	33873, 5860, 15289, 4239	0.5198	0.4531
KRT6B	2	28091, 2634	0.3749	0.4526
ALDH1A1	3	48708, 2259, 1510	0.8981	0.4526
GNB4	4	42713, 531, 12977, 10529	0.4788	0.4521
STK33	4	25133, 22267, 1694, 6913	0.4067	0.4517
PRRG4	4	17648, 32978, 13100, 362	0.2204	0.451
INAFM1	4	7120, 5906, 29510, 13894	0.5706	0.451
MAGEA10-MAGEA5	3	3082, 7900, 36391	0.5644	0.4506
HTR3D	2	8985, 17450	0.3265	0.4504
AKIP1	3	7709, 3745, 34895	0.5528	0.4502
YOD1	2	22387, 4294	0.4164	0.4499
ZMPSTE24	3	10812, 9463, 18960	0.33	0.4494
PPIL1	3	23694, 18270, 1281	0.2457	0.4492
ATP11AUN	3	26014, 6785, 8259	0.4996	0.4489
NSMF	2	17035, 9426	0.3162	0.4487
DEPTOR	2	11465, 15025	0.2663	0.4477
SEPHS1	2	3593, 24627	0.4005	0.4471
MAPKAPK3	3	9952, 5299, 26414	0.5323	0.4471
VPS13A	3	8756, 20849, 9172	0.3836	0.4463
NADK2	2	1886, 31292	0.3596	0.4442
IL20	4	33290, 10666, 14243, 2139	0.5481	0.4426
HIST1H2BK	3	5401, 7258, 31765	0.5256	0.4419
SEMA4G	2	17819, 8703	0.3354	0.4416
CRNKL1	2	9255, 17275	0.3221	0.4415
FOXO1	4	13139, 14364, 20571, 4943	0.3462	0.4405
TMEM8C	4	2752, 35482, 12537, 9907	0.6138	0.4403
SUGP1	3	617, 3408, 49243	0.9053	0.4403
HADHB	2	1623, 32483	0.3556	0.4382
SYNE2	2	3162, 26395	0.3934	0.4376
CA12	2	9974, 16654	0.3068	0.4368
TIMM9	3	19751, 28292, 333	0.1613	0.4358
CSF1	2	10252, 16420	0.3011	0.4356
LGI1	2	17387, 9198	0.325	0.4355
OR2S2	3	22501, 15937, 2769	0.3662	0.4355
CCL17	2	25007, 3579	0.4045	0.4353
NNAT	2	8626, 17926	0.3381	0.4352
ZNF805	4	6901, 20289, 12032, 13435	0.3373	0.4347
C5orf47	3	18453, 2719, 19921	0.3359	0.4337
MFSD1	2	1701, 32285	0.3591	0.4336
ENHO	3	18106, 5262, 17132	0.3058	0.4333
KATNBL1	2	16693, 9983	0.3077	0.4325
TYW1B	3	7914, 12181, 19441	0.3437	0.4314
PRY	3	1075, 18716, 24405	0.2337	0.4313
FOXN3	3	1796, 4472, 45834	0.8067	0.4311
TUBB2B	3	14480, 2866, 25411	0.4269	0.4308
PLA2G16	2	25704, 3415	0.4028	0.4292
RARA	4	4522, 12547, 21457, 14798	0.374	0.4291
CHD3	4	11776, 35891, 3227, 9803	0.6159	0.4286
LRCH1	4	3598, 3845, 25895, 23612	0.3606	0.4285
RMI2	4	38822, 11890, 2590, 9093	0.6438	0.4283
NQO2	2	19151, 7218	0.3681	0.4279
ADGRG6	2	3248, 26271	0.3992	0.4278
DSP	4	19578, 27494, 4702, 4665	0.4055	0.4274
PODN	2	250, 41569	0.3261	0.4272
IFITM2	4	15925, 17579, 12967, 7179	0.252	0.4269
HLA-DQA1	3	32000, 3081, 10754	0.5717	0.4265
LLGL1	4	6795, 8794, 41709, 4875	0.754	0.4261
NAAA	4	16260, 24386, 9087, 4841	0.4639	0.4249
ACTN3	2	28210, 2753	0.3882	0.4248
CA5A	3	33264, 1927, 12453	0.4614	0.4248
CRAT	4	5563, 22486, 22178, 3535	0.4062	0.4247
MFRP	2	364, 40419	0.3298	0.4246
TGFBR1	4	29033, 17127, 14015, 846	0.2676	0.424
RGS8	2	11333, 15396	0.2756	0.4235
ZNF667	3	14843, 16360, 9024	0.2561	0.4227
PLB1	3	23929, 12833, 4436	0.4679	0.4223
LOC100129697	4	815, 19732, 28310, 11186	0.3105	0.4218
TYK2	3	3364, 8026, 36128	0.575	0.421
SPIN4	3	8921, 23410, 7704	0.454	0.42
CCL23	2	13091, 13813	0.2359	0.4198
HOXD3	3	34101, 1425, 13232	0.4119	0.4197
SLC35A1	2	3966, 24099	0.4199	0.4189
APAF1	4	10692, 8665, 5920, 33526	0.5942	0.4189
URB2	2	3970, 24091	0.4202	0.4186
HOXB4	3	2919, 19601, 18720	0.3482	0.416
ZNF57	4	1846, 5382, 39338, 17628	0.5113	0.416
ZNF821	3	2390, 37030, 9298	0.5909	0.4155
CBLB	4	5178, 30745, 34382, 239	0.3318	0.4151
AGO4	2	15630, 11226	0.2815	0.415
ZNF541	3	2854, 3407, 45539	0.8095	0.4148
SETD3	2	23080, 4387	0.4317	0.4146
HSBP1L1	4	13515, 10959, 24751, 5522	0.4747	0.4145
FOXG1	3	8022, 7592, 25780	0.5034	0.4142
ALG5	3	6590, 37726, 3887	0.5716	0.4142
GPR33	3	29103, 8082, 6195	0.5307	0.4137
LY86	4	21754, 11889, 19343, 1992	0.3834	0.4127
HRK	3	694, 9964, 42900	0.501	0.4126
TRIM21	3	41310, 4322, 4327	0.5672	0.4125
XRCC6BP1	4	8293, 43235, 2549, 9945	0.7846	0.4117
PPFIA3	3	13672, 14137, 12710	0.1946	0.4115
LACE1	2	4157, 23833	0.4273	0.4115
CROCC	3	11671, 2286, 33641	0.5144	0.4107
CCDC92	4	7614, 6274, 14404, 28139	0.5696	0.4107
NXPH1	3	8334, 13024, 18803	0.3255	0.4099
FCRL3	3	33895, 6702, 5500	0.543	0.4093
ARFGAP1	3	3152, 16595, 21347	0.3879	0.408
PABPC4	3	10528, 14904, 15023	0.2188	0.4072
RNFT2	3	10409, 29257, 4468	0.5687	0.4066
MRC1	4	4740, 11561, 16389, 21120	0.3635	0.4064
XDH	3	7750, 34955, 4192	0.5696	0.4061
SGPP1	2	4578, 22599	0.4396	0.4058
DAOA	2	11056, 15947	0.2894	0.4049
CD300A	2	24087, 4077	0.4279	0.4048
BMPR1A	3	20942, 22016, 724	0.1976	0.4044
C16orf82	2	3282, 26791	0.409	0.4038
LRRC29	4	32121, 9269, 7286, 9491	0.5568	0.4038
TACR2	4	20403, 20859, 5592, 6140	0.3554	0.4037
SNX30	2	15555, 11459	0.2796	0.4028
TSPAN11	2	24425, 3980	0.4264	0.4025
PKN3	2	14113, 13013	0.2433	0.4023
FBXO10	3	6376, 2215, 42676	0.6066	0.4016
RAP2A	4	23543, 15584, 18367, 894	0.2166	0.4015
[truncated: 14,096 more rows]
